# Supplementary material
Source: publisher site journal article supplement (https://www.dovepress.com/article/157210)
Supplement: Supplementary file 1 [file get_supplementary_file.php]

# Supplementary materials

## Physiologically based pharmacokinetic modeling of nanoceria systemic distribution in rats suggests dose- and route-dependent biokinetics

Ulrika Carlander<sup>1</sup>, Tshepo Paulsen Moto<sup>2</sup>, Anteneh Assefa Desalegn<sup>1</sup>, Robert A. Yokel<sup>3</sup> and Gunnar Johanson<sup>1</sup>

<sup>1</sup> Karolinska Institutet, Institute of Environmental Medicine, Unit of Work Environment Toxicology

<sup>2</sup> University of Pretoria, Faculty of Health Sciences, School of Health Systems and Public Health

<sup>3</sup> University of Kentucky, Department of Pharmaceutical Sciences

Correspondence: Ulrika Carlander

Box 210, SE-171 77 Stockholm, Sweden

Tel +46 733248834

Email: [ulrika.carlanderswetox.se](mailto:ulrika.carlanderswetox.se)

Link to supplementary information: <https://ki.box.com/s/exiu59ri25lihwzhk08fy5gxa93b1tmq>

# Contents

|                                                                                                                                     |    |
|-------------------------------------------------------------------------------------------------------------------------------------|----|
| Abbreviations.....                                                                                                                  | 3  |
| Nanoparticle-independent physiologically based pharmacokinetic (PBPK) model parameters .....                                        | 4  |
| Table S1. Summary of nanoparticle-independent PBPK model parameters. <sup>a</sup> .....                                             | 4  |
| Sensitivity analysis .....                                                                                                          | 5  |
| Table S2. Relative sensitivity coefficient for 5 nm at 10 h (85 mg/kg) .....                                                        | 5  |
| Table S3. Relative sensitivity coefficient for 5 nm at 30 days (end of exposure, 85 mg/kg) .....                                    | 6  |
| Table S4. Relative sensitivity coefficient for 5 nm at 10 h (11 mg/kg) .....                                                        | 7  |
| Table S5. Relative sensitivity coefficient for 5 nm at 30 days (end of exposure, 11 mg/kg) .....                                    | 8  |
| Table S6. Relative sensitivity coefficients for 30 nm at 10 h (87 mg/kg) .....                                                      | 9  |
| Table S7. Relative sensitivity coefficients for 30 nm at 90 d (end of experiment, 87 mg/kg) .....                                   | 10 |
| Calibration 5 nm .....                                                                                                              | 11 |
| Figure S1. Observed versus simulated concentrations in tissues. ....                                                                | 11 |
| Comparison of the 5 nm calibrated PBPK model to independent data set with 3 nm nanoceria .....                                      | 12 |
| Figure S2. Observed versus simulated concentrations in blood. ....                                                                  | 12 |
| Comparison of the 30 nm calibrated PBPK model to independent data sets with nanoceria around 30 nm .....                            | 13 |
| Figure S3. Observed versus simulated concentrations in tissues (Yokel <i>et al.</i> 2013) .....                                     | 13 |
| Figure S4. Observed versus simulated concentrations in tissues (Yokel <i>et al.</i> 2014) .....                                     | 14 |
| Figure S5. Observed versus simulated concentrations in blood (Dan <i>et al.</i> 2012) .....                                         | 15 |
| Figure S6. Observed versus simulated concentrations in tissues (Yokel <i>et al.</i> 2009 – 50 mg/kg) .....                          | 16 |
| Figure S7. Observed versus simulated concentrations in tissues (Yokel <i>et al.</i> 2009 – 250 mg/kg) .....                         | 17 |
| Figure S8. Observed versus simulated concentrations in tissues (Yokel <i>et al.</i> 2009 – 750 mg/kg) .....                         | 18 |
| Figure S9. Observed versus simulated concentrations in tissues (Konduru <i>et al.</i> 2015 – Silica coated CeO <sub>2</sub> ) ..... | 19 |
| Figure S10. Observed versus simulated concentrations in tissues (Konduru <i>et al.</i> 2015 – CeO <sub>2</sub> ) .....              | 20 |
| Comparison of the 5 nm calibrated PBPK to independent data sets with 15 nm ceria .....                                              | 21 |
| Figure S11. Observed versus simulated concentrations in tissues following administration of 15 nm ceria. ....                       | 21 |
| Comparison of the 5 nm calibrated PBPK to independent data sets with 55 nm ceria .....                                              | 22 |
| Figure S12. Observed versus simulated concentrations in tissues for 55 nm ceria. ....                                               | 22 |
| Tissue: liver concentration ratios .....                                                                                            | 23 |
| Figure S13. Blood:liver concentration ratios. ....                                                                                  | 23 |
| Figure S14. Spleen:liver concentration ratios. ....                                                                                 | 24 |
| Figure S15. Brain:liver concentration ratios. ....                                                                                  | 25 |
| Calibration oral administration .....                                                                                               | 26 |
| Figure S16. Observed versus simulated concentrations in feces (Kumari <i>et al.</i> 2014) .....                                     | 26 |
| Figure S17. Observed versus simulated concentrations in tissues (He <i>et al.</i> 2010) .....                                       | 27 |
| Figure S18. Observed versus simulated concentrations in tissues (Park <i>et al.</i> 2009 ) .....                                    | 28 |
| Figure S19. Observed versus simulated concentrations in tissues (Park <i>et al.</i> 2009 ) .....                                    | 29 |
| Calibration inhalation .....                                                                                                        | 30 |
| Figure S20. Observed versus simulated concentrations in tissues (Li <i>et al.</i> 2016– Pristine) .....                             | 30 |
| Figure S21. Observed versus simulated concentrations in tissues (Li <i>et al.</i> 2016 – Aged) .....                                | 31 |
| Figure S22. Observed versus simulated concentrations in tissues (Li <i>et al.</i> 2016 – Aged) .....                                | 32 |
| Calibration <i>it</i> instillation .....                                                                                            | 33 |
| Figure S23. Observed versus simulated concentrations in tissues (He <i>et al.</i> 2010) .....                                       | 33 |
| References .....                                                                                                                    | 34 |

## Abbreviations

|                            |                                                                         |
|----------------------------|-------------------------------------------------------------------------|
| AUC                        | area under the curve                                                    |
| BW                         | body weight                                                             |
| CeO <sub>2</sub>           | cerium dioxide                                                          |
| CL <sub>f</sub>            | clearance rate constant to feces                                        |
| CL <sub>u</sub>            | clearance rate constant to urine                                        |
| fBI <sub>tissue</sub>      | fraction of tissue volume that is blood                                 |
| fQ <sub>tissue</sub>       | fraction of cardiac output to tissue                                    |
| fRBI <sub>brain</sub>      | residual fraction of brain blood after harvesting                       |
| fRBI <sub>tissue</sub>     | residual fraction of tissue blood after harvesting                      |
| fW <sub>tissue</sub>       | tissue weight, fraction of body weight                                  |
| <i>it</i>                  | intratracheally                                                         |
| <i>iv</i>                  | intravenously                                                           |
| k <sub>ab0</sub>           | uptake rate constant to phagocytic cells                                |
| k <sub>sab0</sub>          | uptake rate constant to phagocytic cells in spleen                      |
| M <sub>cap</sub>           | maximum uptake capacity per phagocytic cell                             |
| n <sub>cap in tissue</sub> | number of phagocytizing cells per gram tissue                           |
| P                          | partition coefficient between blood and tissue                          |
| PBPK                       | physiologically based pharmacokinetic                                   |
| R <sup>2</sup>             | coefficient of determination                                            |
| X <sub>brain</sub>         | permeability coefficient from blood to brain.                           |
| X <sub>fast</sub>          | permeability coefficient from blood to liver, spleen, and bone marrow   |
| X <sub>rest</sub>          | permeability coefficient from blood to lung, kidney, heart, and carcass |

## Nanoparticle-independent physiologically based pharmacokinetic (PBPK) model parameters

Table S1. Summary of nanoparticle-independent PBPK model parameters.<sup>a</sup>

| Parameter (unit)                               | Description                                        | Blood                      | Bone Marrow | Brain | Heart | Kidney | Liver | Lung  | Other                       | Spleen |
|------------------------------------------------|----------------------------------------------------|----------------------------|-------------|-------|-------|--------|-------|-------|-----------------------------|--------|
| $fQ_{\text{tissue}}$ (unitless)                | Fraction of cardiac output to tissue               | -                          | 0.0267      | 0.02  | 0.051 | 0.141  | 0.183 | 1     | $1-\sum fQ_{\text{tissue}}$ | 0.0146 |
| $fW_{\text{tissue}}$ (unitless) <sup>b</sup>   | Tissue weight, fraction of body weight             | 0.074                      | 0.03        | 0.006 | 0.003 | 0.007  | 0.034 | 0.005 | $1-\sum fW_{\text{tissue}}$ | 0.002  |
| $fBl_{\text{tissue}}$ (unitless) <sup>b</sup>  | Fraction of tissue volume that is blood            | 0.2 Arterial<br>0.8 Venous | 0.1         | 0.03  | 0.26  | 0.16   | 0.21  | 0.36  | 0.04                        | 0.22   |
| $fRBl_{\text{tissue}}$ (unitless) <sup>c</sup> | Residual fraction of tissue blood after harvesting | -                          | 0.177       | 0.346 | 0.177 | 0.177  | 0.177 | 0.177 | 0.177                       | 0.177  |

<sup>a</sup> Parameter values from Li *et al.*<sup>1</sup>

## Sensitivity analysis

Table S2. Relative sensitivity coefficient for 5 nm at 10 h (85 mg/kg)

| AUC 10 h                                   | Bone  |        |       |       |       |        | Other |       |         |       |        |       |
|--------------------------------------------|-------|--------|-------|-------|-------|--------|-------|-------|---------|-------|--------|-------|
|                                            | Blood | marrow | Brain | Feces | Heart | Kidney | Liver | Lung  | tissues | PC    | Spleen | Urine |
| Body weight                                | 1.13  | 1.02   | 1.07  | 0.06  | 1.11  | 1.11   | 1.02  | 1.06  | 0.86    | 0.96  | 1.07   | 0.09  |
| Dose rate                                  | 1.90  | 0.38   | 1.85  | 1.47  | 1.82  | 1.80   | 0.45  | 0.93  | 1.66    | 0.71  | 1.44   | 1.65  |
| Exposure duration                          | 1.88  | 0.33   | 1.82  | 1.32  | 1.79  | 1.78   | 0.40  | 0.91  | 1.58    | 0.64  | 1.36   | 1.57  |
| CL <sub>f</sub>                            | 0.00  | 0.00   | 0.00  | 1.00  | 0.00  | 0.00   | 0.00  | 0.00  | 0.00    | 0.00  | 0.00   | 0.00  |
| CL <sub>u</sub>                            | 0.00  | 0.00   | 0.00  | 0.00  | 0.00  | 0.00   | 0.00  | 0.00  | 0.00    | 0.00  | 0.00   | 1.00  |
| k <sub>ab0</sub>                           | -0.12 | 0.04   | -0.13 | -0.20 | -0.12 | -0.12  | 0.15  | -0.05 | -0.15   | 0.05  | -0.14  | -0.16 |
| k <sub>sab0</sub>                          | -0.07 | -0.01  | -0.06 | -0.03 | -0.06 | -0.06  | -0.01 | -0.03 | -0.05   | 0.02  | 0.76   | -0.05 |
| k <sub>de</sub>                            | 0.00  | 0.00   | 0.00  | 0.00  | 0.00  | 0.00   | 0.00  | 0.00  | 0.00    | 0.00  | 0.00   | 0.00  |
| M <sub>cap</sub>                           | -0.89 | 0.62   | -0.84 | -0.47 | -0.81 | -0.79  | 0.54  | 0.07  | -0.66   | 0.29  | -0.44  | -0.64 |
| n <sub>cap in blood</sub>                  | 0.00  | 0.00   | 0.00  | 0.00  | 0.00  | 0.00   | 0.00  | 0.00  | 0.00    | 0.00  | 0.00   | 0.00  |
| n <sub>cap in bone marrow</sub>            | -0.31 | 0.72   | -0.30 | -0.18 | -0.30 | -0.29  | -0.06 | -0.15 | -0.24   | 0.10  | -0.21  | -0.24 |
| n <sub>cap in brain</sub>                  | 0.00  | 0.00   | 0.00  | 0.00  | 0.00  | 0.00   | 0.00  | 0.00  | 0.00    | 0.00  | 0.00   | 0.00  |
| n <sub>cap in heart</sub>                  | 0.00  | 0.00   | 0.00  | 0.00  | 0.03  | 0.00   | 0.00  | 0.00  | 0.00    | 0.00  | 0.00   | 0.00  |
| n <sub>cap in kidney</sub>                 | 0.00  | 0.00   | 0.00  | 0.00  | 0.00  | 0.04   | 0.00  | 0.00  | 0.00    | 0.00  | 0.00   | 0.00  |
| n <sub>cap in liver</sub>                  | -0.56 | -0.09  | -0.52 | -0.28 | -0.52 | -0.52  | 0.60  | -0.27 | -0.40   | 0.18  | -0.34  | -0.39 |
| n <sub>cap in lung</sub>                   | -0.01 | 0.00   | -0.01 | -0.01 | -0.01 | -0.01  | 0.00  | 0.50  | -0.01   | 0.00  | -0.01  | -0.01 |
| n <sub>cap in other tissues</sub>          | 0.00  | 0.00   | 0.00  | 0.00  | 0.00  | 0.00   | 0.00  | 0.00  | 0.00    | 0.00  | 0.00   | 0.00  |
| n <sub>cap in spleen</sub>                 | -0.01 | 0.00   | -0.01 | 0.00  | -0.01 | -0.01  | 0.00  | -0.01 | -0.01   | 0.00  | 0.12   | -0.01 |
| P                                          | -0.28 | 0.13   | -0.29 | 0.61  | 0.55  | 0.59   | 0.18  | 0.28  | -0.33   | 0.00  | 0.55   | -0.34 |
| X <sub>brain</sub>                         | 0.00  | 0.00   | 0.22  | 0.00  | 0.00  | 0.00   | 0.00  | 0.00  | 0.00    | 0.00  | 0.00   | 0.00  |
| X <sub>fast</sub>                          | 0.00  | 0.01   | 0.00  | 0.00  | 0.00  | 0.00   | 0.00  | 0.00  | -0.01   | 0.00  | 0.01   | -0.01 |
| X <sub>rest</sub>                          | -0.51 | -0.08  | -0.47 | -0.22 | -0.43 | -0.44  | -0.09 | -0.24 | 0.58    | 0.15  | -0.30  | -0.34 |
| f <sub>Blood<sub>art</sub></sub>           | 0.00  | 0.00   | 0.00  | 0.00  | 0.00  | 0.00   | 0.00  | 0.00  | 0.00    | 0.00  | 0.00   | 0.00  |
| f <sub>blood<sub>bone marrow</sub></sub>   | 0.00  | 0.01   | 0.00  | 0.00  | 0.00  | 0.00   | 0.00  | 0.00  | 0.00    | 0.00  | 0.00   | 0.00  |
| f <sub>blood<sub>brain</sub></sub>         | 0.00  | 0.00   | 0.78  | 0.00  | 0.00  | 0.00   | 0.00  | 0.00  | 0.00    | 0.00  | 0.00   | 0.00  |
| f <sub>blood<sub>heart</sub></sub>         | 0.00  | 0.00   | 0.00  | 0.00  | 0.10  | 0.00   | 0.00  | 0.00  | 0.00    | 0.00  | 0.00   | 0.00  |
| f <sub>blood<sub>kidney</sub></sub>        | 0.00  | 0.00   | 0.00  | 0.00  | 0.00  | 0.07   | 0.00  | 0.00  | 0.00    | 0.00  | 0.00   | 0.00  |
| f <sub>blood<sub>liver</sub></sub>         | 0.00  | 0.00   | 0.00  | 0.00  | 0.00  | 0.00   | 0.01  | 0.00  | 0.00    | 0.00  | 0.00   | 0.00  |
| f <sub>blood<sub>lung</sub></sub>          | 0.00  | 0.00   | 0.00  | 0.00  | 0.00  | 0.00   | 0.00  | 0.07  | 0.00    | 0.00  | 0.00   | 0.00  |
| f <sub>blood<sub>other tissues</sub></sub> | 0.00  | 0.00   | 0.00  | 0.00  | 0.00  | 0.00   | 0.00  | 0.00  | 0.05    | 0.00  | 0.00   | 0.00  |
| f <sub>blood<sub>spleen</sub></sub>        | 0.00  | 0.00   | 0.00  | 0.00  | 0.00  | 0.00   | 0.00  | 0.00  | 0.00    | 0.00  | 0.00   | 0.00  |
| f <sub>Q<sub>bone marrow</sub></sub>       | 0.02  | 0.02   | 0.02  | 0.00  | 0.02  | 0.02   | 0.00  | 0.01  | -0.04   | -0.01 | 0.01   | 0.01  |
| f <sub>Q<sub>brain</sub></sub>             | 0.02  | 0.00   | 0.23  | 0.01  | 0.02  | 0.02   | 0.00  | 0.01  | -0.02   | -0.01 | 0.01   | 0.01  |
| f <sub>Q<sub>heart</sub></sub>             | 0.05  | 0.01   | 0.04  | 0.02  | 0.08  | 0.04   | 0.01  | 0.02  | -0.05   | -0.01 | 0.03   | 0.03  |
| f <sub>Q<sub>kidney</sub></sub>            | 0.13  | 0.02   | 0.12  | 0.05  | 0.12  | 0.15   | 0.02  | 0.06  | -0.15   | -0.04 | 0.07   | 0.08  |
| f <sub>Q<sub>spleen</sub></sub>            | 0.01  | 0.00   | 0.01  | 0.01  | 0.01  | 0.01   | 0.00  | 0.01  | -0.02   | 0.00  | 0.03   | 0.01  |
| f <sub>Q<sub>liver</sub></sub>             | 0.16  | 0.03   | 0.15  | 0.09  | 0.15  | 0.15   | 0.03  | 0.08  | -0.20   | -0.05 | 0.09   | 0.11  |
| f <sub>RBI<sub>brain</sub></sub>           | 0.00  | 0.00   | 0.78  | 0.00  | 0.00  | 0.00   | 0.00  | 0.00  | 0.00    | 0.00  | 0.00   | 0.00  |
| f <sub>RBI<sub>tissue</sub></sub>          | 0.00  | 0.01   | 0.00  | 0.00  | 0.10  | 0.07   | 0.01  | 0.07  | 0.05    | 0.00  | 0.00   | 0.00  |
| f <sub>W<sub>blood</sub></sub>             | 0.80  | -0.07  | -0.22 | -0.38 | -0.21 | -0.21  | -0.10 | -0.11 | -0.31   | -0.15 | -0.27  | -0.31 |
| f <sub>W<sub>bone marrow</sub></sub>       | -0.36 | 0.91   | -0.35 | -0.27 | -0.35 | -0.34  | -0.08 | -0.18 | -0.32   | 0.08  | -0.27  | -0.31 |
| f <sub>W<sub>brain</sub></sub>             | 0.00  | 0.00   | 0.78  | 0.00  | 0.00  | 0.00   | 0.00  | 0.00  | 0.00    | 0.00  | 0.00   | 0.00  |
| f <sub>W<sub>heart</sub></sub>             | 0.00  | 0.00   | 0.00  | 0.00  | 0.96  | 0.00   | 0.00  | 0.00  | 0.00    | 0.00  | 0.00   | 0.00  |
| f <sub>W<sub>kidney</sub></sub>            | -0.01 | 0.00   | -0.01 | -0.01 | -0.01 | 0.96   | 0.00  | 0.00  | -0.01   | 0.00  | -0.01  | -0.01 |
| f <sub>W<sub>liver</sub></sub>             | -0.70 | -0.13  | -0.67 | -0.51 | -0.66 | -0.66  | 0.84  | -0.34 | -0.58   | 0.19  | -0.50  | -0.58 |
| f <sub>W<sub>lung</sub></sub>              | -0.02 | 0.00   | -0.02 | -0.02 | -0.02 | -0.02  | 0.00  | 0.98  | -0.02   | 0.00  | -0.01  | -0.02 |
| f <sub>W<sub>spleen</sub></sub>            | -0.08 | -0.01  | -0.08 | -0.04 | -0.08 | -0.08  | -0.02 | -0.04 | -0.06   | 0.02  | 0.93   | -0.06 |

**Table S3. Relative sensitivity coefficient for 5 nm at 30 days (end of exposure, 85 mg/kg)**

| AUC 30 days                                | Bone  |        |       |       |       |        | Other |       |         |      |        |       |
|--------------------------------------------|-------|--------|-------|-------|-------|--------|-------|-------|---------|------|--------|-------|
|                                            | Blood | marrow | Brain | Feces | Heart | Kidney | Liver | Lung  | tissues | PC   | Spleen | Urine |
| Body weight                                | 1.21  | 1.02   | 0.97  | 0.21  | 1.09  | 1.07   | 1.03  | 1.01  | 0.96    | 1.00 | 1.16   | 0.21  |
| Dose rate                                  | 1.58  | 0.06   | 1.78  | 1.80  | 0.69  | 0.57   | 0.10  | 0.05  | 1.78    | 0.99 | 1.31   | 1.78  |
| Exposure duration                          | 1.58  | 0.06   | 1.78  | 1.80  | 0.69  | 0.57   | 0.10  | 0.05  | 1.78    | 0.99 | 1.31   | 1.78  |
| CL <sub>f</sub>                            | 0.00  | 0.00   | 0.00  | 1.00  | 0.00  | 0.00   | 0.00  | 0.00  | 0.00    | 0.00 | 0.00   | 0.00  |
| CL <sub>u</sub>                            | 0.00  | 0.00   | 0.00  | 0.00  | 0.00  | 0.00   | 0.00  | 0.00  | 0.00    | 0.00 | 0.00   | 1.00  |
| k <sub>ab0</sub>                           | -0.12 | 0.08   | -0.09 | -0.09 | -0.05 | -0.04  | 0.10  | 0.02  | -0.08   | 0.00 | -0.08  | -0.09 |
| k <sub>sab0</sub>                          | -0.05 | 0.00   | -0.07 | -0.07 | -0.02 | -0.02  | 0.00  | 0.00  | -0.07   | 0.00 | 0.71   | -0.07 |
| k <sub>de</sub>                            | 0.19  | -0.10  | 0.15  | 0.15  | 0.08  | 0.07   | -0.16 | -0.02 | 0.14    | 0.00 | -0.24  | 0.15  |
| M <sub>cap</sub>                           | -0.58 | 0.94   | -0.77 | -0.79 | 0.32  | 0.43   | 0.90  | 0.95  | -0.78   | 0.00 | -0.32  | -0.78 |
| n <sub>cap in blood</sub>                  | 0.01  | 0.00   | 0.00  | 0.00  | 0.00  | 0.00   | 0.00  | 0.00  | 0.00    | 0.00 | 0.00   | 0.00  |
| n <sub>cap in bone marrow</sub>            | -0.20 | 0.90   | -0.25 | -0.26 | -0.09 | -0.07  | 0.01  | 0.00  | -0.26   | 0.00 | -0.18  | -0.26 |
| n <sub>cap in brain</sub>                  | 0.00  | 0.00   | 0.00  | 0.00  | 0.00  | 0.00   | 0.00  | 0.00  | 0.00    | 0.00 | 0.00   | 0.00  |
| n <sub>cap in heart</sub>                  | 0.00  | 0.00   | 0.00  | 0.00  | 0.57  | 0.00   | 0.00  | 0.00  | 0.00    | 0.00 | 0.00   | 0.00  |
| n <sub>cap in kidney</sub>                 | 0.00  | 0.00   | 0.00  | 0.00  | 0.00  | 0.64   | 0.00  | 0.00  | 0.00    | 0.00 | 0.00   | 0.00  |
| n <sub>cap in liver</sub>                  | -0.37 | 0.04   | -0.49 | -0.50 | -0.16 | -0.13  | 0.89  | 0.01  | -0.49   | 0.00 | -0.34  | -0.49 |
| n <sub>cap in lung</sub>                   | -0.01 | 0.00   | -0.01 | -0.01 | 0.00  | 0.00   | 0.00  | 0.94  | -0.01   | 0.00 | -0.01  | -0.01 |
| n <sub>cap in other tissues</sub>          | 0.00  | 0.00   | 0.00  | 0.00  | 0.00  | 0.00   | 0.00  | 0.00  | 0.00    | 0.00 | 0.00   | 0.00  |
| n <sub>cap in spleen</sub>                 | -0.02 | 0.00   | -0.02 | -0.02 | -0.01 | -0.01  | 0.00  | 0.00  | -0.02   | 0.00 | 0.21   | -0.02 |
| P                                          | -0.17 | 0.09   | -0.17 | 0.83  | 0.31  | 0.27   | 0.11  | 0.04  | -0.15   | 0.00 | 0.62   | -0.17 |
| X <sub>brain</sub>                         | 0.00  | 0.00   | 0.96  | 0.00  | 0.00  | 0.00   | 0.00  | 0.00  | 0.00    | 0.00 | 0.00   | 0.00  |
| X <sub>fast</sub>                          | 0.00  | 0.00   | 0.00  | 0.00  | 0.00  | 0.00   | 0.00  | 0.00  | 0.00    | 0.00 | 0.01   | 0.00  |
| X <sub>rest</sub>                          | -0.80 | -0.09  | -0.81 | -0.82 | -0.35 | -0.29  | -0.11 | -0.05 | 0.16    | 0.01 | -0.63  | -0.81 |
| f <sub>blood<sub>art</sub></sub>           | 0.00  | 0.00   | 0.00  | 0.00  | 0.00  | 0.00   | 0.00  | 0.00  | 0.00    | 0.00 | 0.00   | 0.00  |
| f <sub>blood<sub>bone marrow</sub></sub>   | 0.00  | 0.00   | 0.00  | 0.00  | 0.00  | 0.00   | 0.00  | 0.00  | 0.00    | 0.00 | 0.00   | 0.00  |
| f <sub>blood<sub>brain</sub></sub>         | 0.00  | 0.00   | 0.04  | 0.00  | 0.00  | 0.00   | 0.00  | 0.00  | 0.00    | 0.00 | 0.00   | 0.00  |
| f <sub>blood<sub>heart</sub></sub>         | 0.00  | 0.00   | 0.00  | 0.00  | 0.05  | 0.00   | 0.00  | 0.00  | 0.00    | 0.00 | 0.00   | 0.00  |
| f <sub>blood<sub>kidney</sub></sub>        | 0.00  | 0.00   | 0.00  | 0.00  | 0.00  | 0.02   | 0.00  | 0.00  | 0.00    | 0.00 | 0.00   | 0.00  |
| f <sub>blood<sub>liver</sub></sub>         | 0.00  | 0.00   | 0.00  | 0.00  | 0.00  | 0.00   | 0.00  | 0.00  | 0.00    | 0.00 | 0.00   | 0.00  |
| f <sub>blood<sub>lung</sub></sub>          | 0.00  | 0.00   | 0.00  | 0.00  | 0.00  | 0.00   | 0.00  | 0.00  | 0.00    | 0.00 | 0.00   | 0.00  |
| f <sub>blood<sub>other tissues</sub></sub> | 0.00  | 0.00   | 0.00  | 0.00  | 0.00  | 0.00   | 0.00  | 0.00  | 0.00    | 0.00 | 0.00   | 0.00  |
| f <sub>blood<sub>spleen</sub></sub>        | 0.00  | 0.00   | 0.00  | 0.00  | 0.00  | 0.00   | 0.00  | 0.00  | 0.00    | 0.00 | 0.00   | 0.00  |
| fQ <sub>bone marrow</sub>                  | 0.04  | 0.00   | 0.04  | 0.04  | 0.02  | 0.01   | 0.01  | 0.00  | -0.01   | 0.00 | 0.03   | 0.04  |
| fQ <sub>brain</sub>                        | 0.03  | 0.00   | 0.99  | 0.03  | 0.01  | 0.01   | 0.00  | 0.00  | -0.01   | 0.00 | 0.02   | 0.03  |
| fQ <sub>heart</sub>                        | 0.07  | 0.01   | 0.07  | 0.07  | 0.03  | 0.03   | 0.01  | 0.00  | -0.01   | 0.00 | 0.06   | 0.07  |
| fQ <sub>kidney</sub>                       | 0.20  | 0.02   | 0.21  | 0.21  | 0.09  | 0.07   | 0.03  | 0.01  | -0.04   | 0.00 | 0.16   | 0.21  |
| fQ <sub>spleen</sub>                       | 0.02  | 0.00   | 0.02  | 0.02  | 0.01  | 0.01   | 0.00  | 0.00  | 0.00    | 0.00 | 0.03   | 0.02  |
| fQ <sub>liver</sub>                        | 0.26  | 0.03   | 0.27  | 0.27  | 0.11  | 0.10   | 0.04  | 0.02  | -0.05   | 0.00 | 0.21   | 0.27  |
| fRBI <sub>brain</sub>                      | 0.00  | 0.00   | 0.04  | 0.00  | 0.00  | 0.00   | 0.00  | 0.00  | 0.00    | 0.00 | 0.00   | 0.00  |
| fRBI <sub>tissue</sub>                     | 0.00  | 0.00   | 0.00  | 0.00  | 0.05  | 0.02   | 0.00  | 0.00  | 0.00    | 0.00 | 0.00   | 0.00  |
| fW <sub>blood</sub>                        | 1.00  | 0.00   | -0.01 | -0.01 | 0.00  | 0.00   | 0.00  | 0.00  | -0.01   | 0.00 | 0.00   | -0.01 |
| fW <sub>bone marrow</sub>                  | -0.23 | 1.01   | -0.28 | -0.28 | -0.10 | -0.08  | 0.00  | 0.00  | -0.28   | 0.00 | -0.20  | -0.28 |
| fW <sub>brain</sub>                        | 0.00  | 0.00   | 0.04  | 0.00  | 0.00  | 0.00   | 0.00  | 0.00  | 0.00    | 0.00 | 0.00   | 0.00  |
| fW <sub>heart</sub>                        | 0.00  | 0.00   | 0.00  | 0.00  | 1.00  | 0.00   | 0.00  | 0.00  | 0.00    | 0.00 | 0.00   | 0.00  |
| fW <sub>kidney</sub>                       | 0.00  | 0.00   | 0.00  | 0.00  | 0.00  | 1.00   | 0.00  | 0.00  | 0.00    | 0.00 | 0.00   | 0.00  |
| fW <sub>liver</sub>                        | -0.44 | 0.02   | -0.55 | -0.57 | -0.19 | -0.16  | 1.01  | 0.00  | -0.55   | 0.00 | -0.39  | -0.55 |
| fW <sub>lung</sub>                         | -0.01 | 0.00   | -0.01 | -0.01 | 0.00  | 0.00   | 0.00  | 1.00  | -0.01   | 0.00 | -0.01  | -0.01 |
| fW <sub>spleen</sub>                       | -0.07 | 0.00   | -0.09 | -0.09 | -0.03 | -0.03  | 0.00  | 0.00  | -0.09   | 0.00 | 0.93   | -0.09 |

**Table S4. Relative sensitivity coefficient for 5 nm at 10 h (11 mg/kg)**

| AUC 10 h                                    | Bone  |        |       |       |       | Other  |       |       |         |       |        |       |
|---------------------------------------------|-------|--------|-------|-------|-------|--------|-------|-------|---------|-------|--------|-------|
|                                             | Blood | marrow | Brain | Feces | Heart | Kidney | Liver | Lung  | tissues | PC    | Spleen | Urine |
| Body weight                                 | 1.06  | 0.99   | 1.00  | 0.04  | 1.03  | 1.02   | 1.04  | 1.01  | 0.82    | 1.00  | 1.05   | 0.05  |
| Dose rate                                   | 1.10  | 0.99   | 1.10  | 1.08  | 0.72  | 0.63   | 1.01  | 0.54  | 1.09    | 0.99  | 1.09   | 1.09  |
| Exposure duration                           | 1.10  | 0.93   | 1.09  | 0.97  | 0.71  | 0.63   | 0.95  | 0.49  | 1.04    | 0.93  | 1.03   | 1.03  |
| CL <sub>f</sub>                             | 0.00  | 0.00   | 0.00  | 1.00  | 0.00  | 0.00   | 0.00  | 0.00  | 0.00    | 0.00  | 0.00   | 0.00  |
| CL <sub>u</sub>                             | 0.00  | 0.00   | 0.00  | 0.00  | 0.00  | 0.00   | 0.00  | 0.00  | 0.00    | 0.00  | 0.00   | 1.00  |
| k <sub>ab0</sub>                            | -0.73 | 0.07   | -0.71 | -0.64 | -0.46 | -0.41  | 0.24  | 0.05  | -0.65   | 0.08  | -0.65  | -0.66 |
| k <sub>sab0</sub>                           | -0.02 | -0.02  | -0.02 | -0.02 | -0.02 | -0.01  | -0.02 | -0.01 | -0.02   | 0.00  | 0.91   | -0.02 |
| k <sub>de</sub>                             | 0.01  | 0.00   | 0.01  | 0.00  | 0.01  | 0.00   | 0.00  | 0.00  | 0.00    | 0.00  | 0.00   | 0.00  |
| M <sub>cap</sub>                            | -0.10 | 0.01   | -0.10 | -0.08 | 0.28  | 0.37   | -0.01 | 0.45  | -0.09   | 0.01  | -0.08  | -0.09 |
| n <sub>cap</sub> in blood                   | 0.01  | 0.00   | 0.00  | 0.00  | 0.00  | 0.00   | 0.00  | 0.00  | 0.00    | 0.00  | 0.00   | 0.00  |
| n <sub>cap</sub> in brain                   | 0.00  | 0.00   | 0.00  | 0.00  | 0.00  | 0.00   | 0.00  | 0.00  | 0.00    | 0.00  | 0.00   | 0.00  |
| n <sub>cap</sub> in bone marrow             | -0.04 | 0.07   | -0.04 | -0.03 | -0.02 | -0.02  | -0.03 | -0.01 | -0.03   | 0.00  | -0.03  | -0.03 |
| n <sub>cap</sub> in heart                   | 0.00  | 0.00   | 0.00  | 0.00  | 0.35  | 0.00   | 0.00  | 0.00  | 0.00    | 0.00  | 0.00   | 0.00  |
| n <sub>cap</sub> in kidney                  | 0.00  | 0.00   | 0.00  | 0.00  | 0.00  | 0.43   | 0.00  | 0.00  | 0.00    | 0.00  | 0.00   | 0.00  |
| n <sub>cap</sub> in liver                   | -0.05 | -0.04  | -0.04 | -0.04 | -0.03 | -0.03  | 0.04  | -0.02 | -0.04   | 0.00  | -0.04  | -0.04 |
| n <sub>cap</sub> in lung                    | -0.02 | -0.02  | -0.02 | -0.02 | -0.01 | -0.01  | -0.02 | 0.49  | -0.02   | 0.00  | -0.02  | -0.02 |
| n <sub>cap</sub> in other tissues           | 0.00  | 0.00   | 0.00  | 0.00  | 0.00  | 0.00   | 0.00  | 0.00  | 0.00    | 0.00  | 0.00   | 0.00  |
| n <sub>cap</sub> in spleen                  | 0.00  | 0.00   | 0.00  | 0.00  | 0.00  | 0.00   | 0.00  | 0.00  | 0.00    | 0.00  | 0.01   | 0.00  |
| P                                           | -0.75 | 0.04   | -0.74 | 0.29  | 0.05  | 0.06   | 0.22  | 0.06  | -0.70   | 0.05  | 0.25   | -0.70 |
| X <sub>brain</sub>                          | 0.00  | 0.00   | 0.25  | 0.00  | 0.00  | 0.00   | 0.00  | 0.00  | 0.00    | 0.00  | 0.00   | 0.00  |
| X <sub>fast</sub>                           | -0.06 | 0.08   | -0.06 | -0.03 | -0.04 | -0.04  | -0.03 | -0.03 | -0.06   | 0.00  | -0.04  | -0.06 |
| X <sub>rest</sub>                           | -0.13 | -0.11  | -0.13 | -0.11 | -0.04 | -0.03  | -0.11 | 0.03  | 0.82    | 0.01  | -0.12  | -0.12 |
| f <sub>blood</sub> <sub>art</sub>           | 0.00  | 0.00   | 0.00  | 0.00  | 0.00  | 0.00   | 0.00  | 0.00  | 0.00    | 0.00  | 0.00   | 0.00  |
| f <sub>blood</sub> <sub>bone marrow</sub>   | 0.00  | 0.00   | 0.00  | 0.00  | 0.00  | 0.00   | 0.00  | 0.00  | 0.00    | 0.00  | 0.00   | 0.00  |
| f <sub>blood</sub> <sub>brain</sub>         | 0.00  | 0.00   | 0.75  | 0.00  | 0.00  | 0.00   | 0.00  | 0.00  | 0.00    | 0.00  | 0.00   | 0.00  |
| f <sub>blood</sub> <sub>heart</sub>         | 0.00  | 0.00   | 0.00  | 0.00  | 0.07  | 0.00   | 0.00  | 0.00  | 0.00    | 0.00  | 0.00   | 0.00  |
| f <sub>blood</sub> <sub>kidney</sub>        | 0.00  | 0.00   | 0.00  | 0.00  | 0.00  | 0.04   | 0.00  | 0.00  | 0.00    | 0.00  | 0.00   | 0.00  |
| f <sub>blood</sub> <sub>liver</sub>         | 0.00  | 0.00   | 0.00  | 0.00  | 0.00  | 0.00   | 0.00  | 0.00  | 0.00    | 0.00  | 0.00   | 0.00  |
| f <sub>blood</sub> <sub>lung</sub>          | 0.00  | 0.00   | 0.00  | 0.00  | 0.00  | 0.00   | 0.00  | 0.01  | 0.00    | 0.00  | 0.00   | 0.00  |
| f <sub>blood</sub> <sub>other tissues</sub> | 0.00  | 0.00   | 0.00  | 0.00  | 0.00  | 0.00   | 0.00  | 0.00  | 0.05    | 0.00  | 0.00   | 0.00  |
| f <sub>blood</sub> <sub>spleen</sub>        | 0.00  | 0.00   | 0.00  | 0.00  | 0.00  | 0.00   | 0.00  | 0.00  | 0.00    | 0.00  | 0.00   | 0.00  |
| f <sub>Q</sub> <sub>bone marrow</sub>       | -0.07 | 0.16   | -0.07 | -0.07 | -0.05 | -0.04  | -0.06 | -0.03 | -0.11   | 0.01  | -0.07  | -0.07 |
| f <sub>Q</sub> <sub>brain</sub>             | 0.00  | 0.00   | 0.25  | 0.00  | 0.00  | 0.00   | 0.00  | 0.00  | -0.03   | 0.00  | 0.00   | 0.00  |
| f <sub>Q</sub> <sub>heart</sub>             | 0.01  | 0.01   | 0.01  | 0.01  | 0.05  | 0.01   | 0.01  | 0.01  | -0.08   | 0.00  | 0.01   | 0.01  |
| f <sub>Q</sub> <sub>kidney</sub>            | 0.03  | 0.03   | 0.03  | 0.03  | 0.02  | 0.06   | 0.03  | 0.01  | -0.21   | 0.00  | 0.03   | 0.03  |
| f <sub>Q</sub> <sub>liver</sub>             | 0.02  | 0.02   | 0.02  | 0.06  | 0.01  | 0.01   | 0.06  | 0.01  | -0.29   | 0.00  | 0.02   | 0.02  |
| f <sub>Q</sub> <sub>spleen</sub>            | 0.00  | 0.00   | 0.00  | 0.00  | 0.00  | 0.00   | 0.00  | 0.00  | -0.02   | 0.00  | 0.03   | 0.00  |
| fRBI <sub>brain</sub>                       | 0.00  | 0.00   | 0.75  | 0.00  | 0.00  | 0.00   | 0.00  | 0.00  | 0.00    | 0.00  | 0.00   | 0.00  |
| fRBI <sub>tissue</sub>                      | 0.00  | 0.00   | 0.00  | 0.00  | 0.07  | 0.04   | 0.00  | 0.01  | 0.05    | 0.00  | 0.00   | 0.00  |
| fW <sub>blood</sub>                         | 1.00  | -0.07  | -0.02 | -0.14 | -0.01 | -0.01  | -0.07 | -0.05 | -0.08   | -0.07 | -0.07  | -0.07 |
| fW <sub>bone marrow</sub>                   | -0.29 | 0.54   | -0.28 | -0.24 | -0.18 | -0.16  | -0.24 | -0.13 | -0.26   | 0.02  | -0.26  | -0.26 |
| fW <sub>brain</sub>                         | 0.00  | 0.00   | 0.75  | 0.00  | 0.00  | 0.00   | 0.00  | 0.00  | 0.00    | 0.00  | 0.00   | 0.00  |
| fW <sub>heart</sub>                         | 0.00  | 0.00   | 0.00  | 0.00  | 0.95  | 0.00   | 0.00  | 0.00  | 0.00    | 0.00  | 0.00   | 0.00  |
| fW <sub>kidney</sub>                        | 0.00  | 0.00   | 0.00  | -0.01 | 0.00  | 0.95   | 0.00  | 0.00  | -0.01   | 0.00  | 0.00   | 0.00  |
| fW <sub>liver</sub>                         | -0.51 | -0.43  | -0.50 | -0.49 | -0.33 | -0.29  | 0.52  | -0.23 | -0.48   | 0.04  | -0.47  | -0.47 |
| fW <sub>lung</sub>                          | -0.03 | -0.03  | -0.03 | -0.03 | -0.02 | -0.02  | -0.03 | 0.90  | -0.03   | 0.00  | -0.03  | -0.03 |
| fW <sub>spleen</sub>                        | -0.02 | -0.02  | -0.02 | -0.02 | -0.02 | -0.01  | -0.02 | -0.01 | -0.02   | 0.00  | 0.95   | -0.02 |

**Table S5. Relative sensitivity coefficient for 5 nm at 30 days (end of exposure, 11 mg/kg)**

| AUC 720 h                                   | Bone  |        |       |       |       | Other  |       |       |         |      |        |       |
|---------------------------------------------|-------|--------|-------|-------|-------|--------|-------|-------|---------|------|--------|-------|
|                                             | Blood | marrow | Brain | Feces | Heart | Kidney | Liver | Lung  | tissues | PC   | Spleen | Urine |
| Body weight                                 | 1.05  | 1.02   | 0.83  | 0.05  | 1.00  | 1.00   | 1.05  | 1.02  | 0.82    | 1.00 | 1.06   | 0.06  |
| Dose rate                                   | 0.90  | 0.97   | 1.13  | 1.14  | 0.06  | 0.06   | 1.01  | 0.40  | 1.14    | 1.00 | 1.13   | 1.14  |
| Exposure duration                           | 0.90  | 0.96   | 1.12  | 1.14  | 0.06  | 0.06   | 1.01  | 0.40  | 1.14    | 1.00 | 1.13   | 1.14  |
| CL <sub>f</sub>                             | 0.00  | 0.00   | 0.00  | 1.00  | 0.00  | 0.00   | 0.00  | 0.00  | 0.00    | 0.00 | 0.00   | 0.00  |
| CL <sub>u</sub>                             | 0.00  | 0.00   | 0.00  | 0.00  | 0.00  | 0.00   | 0.00  | 0.00  | 0.00    | 0.00 | 0.00   | 1.00  |
| k <sub>ab0</sub>                            | -0.55 | 0.10   | -0.71 | -0.75 | -0.02 | -0.01  | 0.22  | 0.08  | -0.70   | 0.00 | -0.71  | -0.72 |
| k <sub>sab0</sub>                           | -0.02 | -0.02  | -0.02 | -0.02 | 0.00  | 0.00   | -0.02 | -0.01 | -0.02   | 0.00 | 0.94   | -0.02 |
| k <sub>de</sub>                             | 0.33  | -0.03  | 0.28  | 0.29  | 0.01  | 0.01   | -0.07 | -0.09 | 0.28    | 0.00 | -0.06  | 0.28  |
| M <sub>cap</sub>                            | 0.10  | 0.03   | -0.12 | -0.14 | 0.94  | 0.94   | -0.01 | 0.60  | -0.14   | 0.00 | -0.13  | -0.14 |
| n <sub>cap</sub> in blood                   | 0.22  | 0.00   | 0.01  | 0.00  | 0.00  | 0.00   | 0.00  | 0.00  | 0.00    | 0.00 | 0.00   | 0.00  |
| n <sub>cap</sub> in brain                   | 0.00  | 0.00   | 0.00  | 0.00  | 0.00  | 0.00   | 0.00  | 0.00  | 0.00    | 0.00 | 0.00   | 0.00  |
| n <sub>cap</sub> in bone marrow             | -0.05 | 0.10   | -0.05 | -0.05 | 0.00  | 0.00   | -0.05 | -0.02 | -0.05   | 0.00 | -0.06  | -0.05 |
| n <sub>cap</sub> in heart                   | 0.00  | 0.00   | 0.00  | 0.00  | 0.94  | 0.00   | 0.00  | 0.00  | 0.00    | 0.00 | 0.00   | 0.00  |
| n <sub>cap</sub> in kidney                  | 0.00  | 0.00   | 0.00  | 0.00  | 0.00  | 0.95   | 0.00  | 0.00  | 0.00    | 0.00 | 0.00   | 0.00  |
| n <sub>cap</sub> in liver                   | -0.05 | -0.05  | -0.06 | -0.06 | 0.00  | 0.00   | 0.06  | -0.02 | -0.06   | 0.00 | -0.06  | -0.06 |
| n <sub>cap</sub> in lung                    | -0.02 | -0.02  | -0.02 | -0.02 | 0.00  | 0.00   | -0.02 | 0.64  | -0.02   | 0.00 | -0.02  | -0.02 |
| n <sub>cap</sub> in other tissues           | 0.00  | 0.00   | 0.00  | 0.00  | 0.00  | 0.00   | 0.00  | 0.00  | 0.00    | 0.00 | 0.00   | 0.00  |
| n <sub>cap</sub> in spleen                  | 0.00  | 0.00   | 0.00  | 0.00  | 0.00  | 0.00   | 0.00  | 0.00  | 0.00    | 0.00 | 0.01   | 0.00  |
| P                                           | -0.57 | 0.08   | -0.73 | 0.22  | 0.01  | 0.01   | 0.20  | 0.07  | -0.73   | 0.00 | 0.23   | -0.74 |
| X <sub>brain</sub>                          | 0.00  | 0.00   | 0.94  | 0.00  | 0.00  | 0.00   | 0.00  | 0.00  | 0.00    | 0.00 | 0.00   | 0.00  |
| X <sub>fast</sub>                           | -0.02 | 0.05   | -0.04 | -0.02 | 0.00  | 0.00   | -0.02 | -0.01 | -0.04   | 0.00 | -0.03  | -0.04 |
| X <sub>rest</sub>                           | -0.17 | -0.16  | -0.18 | -0.18 | -0.01 | -0.01  | -0.17 | -0.05 | 0.80    | 0.00 | -0.19  | -0.18 |
| f <sub>blood</sub> <sub>art</sub>           | 0.00  | 0.00   | 0.00  | 0.00  | 0.00  | 0.00   | 0.00  | 0.00  | 0.00    | 0.00 | 0.00   | 0.00  |
| f <sub>blood</sub> <sub>bone marrow</sub>   | 0.00  | 0.00   | 0.00  | 0.00  | 0.00  | 0.00   | 0.00  | 0.00  | 0.00    | 0.00 | 0.00   | 0.00  |
| f <sub>blood</sub> <sub>brain</sub>         | 0.00  | 0.00   | 0.06  | 0.00  | 0.00  | 0.00   | 0.00  | 0.00  | 0.00    | 0.00 | 0.00   | 0.00  |
| f <sub>blood</sub> <sub>heart</sub>         | 0.00  | 0.00   | 0.00  | 0.00  | 0.01  | 0.00   | 0.00  | 0.00  | 0.00    | 0.00 | 0.00   | 0.00  |
| f <sub>blood</sub> <sub>kidney</sub>        | 0.00  | 0.00   | 0.00  | 0.00  | 0.00  | 0.00   | 0.00  | 0.00  | 0.00    | 0.00 | 0.00   | 0.00  |
| f <sub>blood</sub> <sub>liver</sub>         | 0.00  | 0.00   | 0.00  | 0.00  | 0.00  | 0.00   | 0.00  | 0.00  | 0.00    | 0.00 | 0.00   | 0.00  |
| f <sub>blood</sub> <sub>lung</sub>          | 0.00  | 0.00   | 0.00  | 0.00  | 0.00  | 0.00   | 0.00  | 0.00  | 0.00    | 0.00 | 0.00   | 0.00  |
| f <sub>blood</sub> <sub>other tissues</sub> | 0.00  | 0.00   | 0.00  | 0.00  | 0.00  | 0.00   | 0.00  | 0.00  | 0.00    | 0.00 | 0.00   | 0.00  |
| f <sub>blood</sub> <sub>spleen</sub>        | 0.00  | 0.00   | 0.00  | 0.00  | 0.00  | 0.00   | 0.00  | 0.00  | 0.00    | 0.00 | 0.00   | 0.00  |
| f <sub>Q</sub> <sub>bone marrow</sub>       | -0.02 | 0.10   | -0.04 | -0.04 | 0.00  | 0.00   | -0.03 | -0.01 | -0.09   | 0.00 | -0.04  | -0.04 |
| f <sub>Q</sub> <sub>brain</sub>             | 0.01  | 0.01   | 0.95  | 0.01  | 0.00  | 0.00   | 0.01  | 0.00  | -0.03   | 0.00 | 0.01   | 0.01  |
| f <sub>Q</sub> <sub>heart</sub>             | 0.02  | 0.02   | 0.02  | 0.02  | 0.00  | 0.00   | 0.02  | 0.01  | -0.07   | 0.00 | 0.02   | 0.02  |
| f <sub>Q</sub> <sub>kidney</sub>            | 0.04  | 0.04   | 0.05  | 0.05  | 0.00  | 0.00   | 0.04  | 0.02  | -0.20   | 0.00 | 0.05   | 0.05  |
| f <sub>Q</sub> <sub>liver</sub>             | 0.05  | 0.04   | 0.05  | 0.07  | 0.00  | 0.00   | 0.07  | 0.02  | -0.27   | 0.00 | 0.05   | 0.05  |
| f <sub>Q</sub> <sub>spleen</sub>            | 0.00  | 0.00   | 0.00  | 0.01  | 0.00  | 0.00   | 0.01  | 0.00  | -0.02   | 0.00 | 0.02   | 0.00  |
| fRBI <sub>brain</sub>                       | 0.00  | 0.00   | 0.06  | 0.00  | 0.00  | 0.00   | 0.00  | 0.00  | 0.00    | 0.00 | 0.00   | 0.00  |
| fRBI <sub>tissue</sub>                      | 0.00  | 0.00   | 0.00  | 0.00  | 0.01  | 0.00   | 0.00  | 0.00  | 0.00    | 0.00 | 0.00   | 0.00  |
| fW <sub>blood</sub>                         | 1.00  | 0.00   | 0.00  | 0.00  | 0.00  | 0.00   | 0.00  | 0.00  | 0.00    | 0.00 | 0.00   | 0.00  |
| fW <sub>bone marrow</sub>                   | -0.26 | 0.59   | -0.31 | -0.32 | -0.02 | -0.02  | -0.28 | -0.12 | -0.32   | 0.00 | -0.32  | -0.32 |
| fW <sub>brain</sub>                         | 0.00  | 0.00   | 0.06  | 0.00  | 0.00  | 0.00   | 0.00  | 0.00  | 0.00    | 0.00 | 0.00   | 0.00  |
| fW <sub>heart</sub>                         | 0.00  | 0.00   | 0.00  | 0.00  | 1.00  | 0.00   | 0.00  | 0.00  | 0.00    | 0.00 | 0.00   | 0.00  |
| fW <sub>kidney</sub>                        | 0.00  | 0.00   | 0.00  | 0.00  | 0.00  | 1.00   | 0.00  | 0.00  | 0.00    | 0.00 | 0.00   | 0.00  |
| fW <sub>liver</sub>                         | -0.38 | -0.42  | -0.50 | -0.53 | -0.03 | -0.02  | 0.53  | -0.17 | -0.50   | 0.00 | -0.49  | -0.50 |
| fW <sub>lung</sub>                          | -0.02 | -0.03  | -0.03 | -0.03 | 0.00  | 0.00   | -0.03 | 0.97  | -0.03   | 0.00 | -0.03  | -0.03 |
| fW <sub>spleen</sub>                        | -0.02 | -0.02  | -0.02 | -0.02 | 0.00  | 0.00   | -0.02 | -0.01 | -0.02   | 0.00 | 0.96   | -0.02 |



**Table S6. Relative sensitivity coefficients for 30 nm at 10 h (87 mg/kg)**

| AUC 10 h                                    | Bone  |        |       |       |       |        | Other |       |         |       |        |       |
|---------------------------------------------|-------|--------|-------|-------|-------|--------|-------|-------|---------|-------|--------|-------|
|                                             | Blood | marrow | Brain | Feces | Heart | Kidney | Liver | Lung  | tissues | PC    | Spleen | Urine |
| Body weight                                 | 1.03  | 1.01   | 1.03  | 0.01  | 1.00  | 1.00   | 1.01  | 1.01  | 0.86    | 0.97  | 1.01   | 0.02  |
| Dose rate                                   | 1.24  | 0.61   | 1.24  | 1.07  | 1.18  | 1.16   | 0.80  | 0.61  | 1.18    | 0.73  | 0.81   | 1.14  |
| Exposure duration                           | 1.21  | 0.55   | 1.21  | 0.91  | 1.14  | 1.12   | 0.73  | 0.57  | 1.11    | 0.66  | 0.74   | 1.05  |
| CL <sub>f</sub>                             | 0.00  | 0.00   | 0.00  | 1.00  | 0.00  | 0.00   | 0.00  | 0.00  | 0.00    | 0.00  | 0.00   | 0.00  |
| CL <sub>u</sub>                             | 0.00  | 0.00   | 0.00  | 0.00  | 0.00  | 0.00   | 0.00  | 0.00  | 0.00    | 0.00  | 0.00   | 1.00  |
| k <sub>ab0</sub>                            | -0.25 | 0.29   | -0.25 | -0.17 | -0.23 | -0.23  | 0.43  | -0.08 | -0.21   | 0.28  | -0.14  | -0.21 |
| k <sub>sab0</sub>                           | -0.07 | -0.03  | -0.07 | -0.04 | -0.07 | -0.07  | -0.04 | -0.03 | -0.06   | 0.08  | 0.65   | -0.06 |
| k <sub>de</sub>                             | 0.01  | 0.00   | 0.00  | 0.00  | 0.00  | 0.00   | -0.01 | 0.00  | 0.00    | -0.01 | -0.01  | 0.00  |
| M <sub>cap</sub>                            | -0.24 | 0.38   | -0.24 | -0.07 | -0.17 | -0.15  | 0.20  | 0.39  | -0.18   | 0.26  | 0.18   | -0.14 |
| n <sub>cap</sub> in blood                   | 0.00  | 0.00   | 0.00  | 0.00  | 0.00  | 0.00   | 0.00  | 0.00  | 0.00    | 0.00  | 0.00   | 0.00  |
| n <sub>cap</sub> in bone marrow             | -0.10 | 0.42   | -0.10 | -0.03 | -0.09 | -0.09  | -0.04 | -0.05 | -0.08   | 0.11  | -0.04  | -0.06 |
| n <sub>cap</sub> in brain                   | 0.00  | 0.00   | 0.00  | 0.00  | 0.00  | 0.00   | 0.00  | 0.00  | 0.00    | 0.00  | 0.00   | 0.00  |
| n <sub>cap</sub> in heart                   | 0.00  | 0.00   | 0.00  | 0.00  | 0.03  | 0.00   | 0.00  | 0.00  | 0.00    | 0.00  | 0.00   | 0.00  |
| n <sub>cap</sub> in kidney                  | 0.00  | 0.00   | 0.00  | 0.00  | 0.00  | 0.05   | 0.00  | 0.00  | 0.00    | 0.00  | 0.00   | 0.00  |
| n <sub>cap</sub> in liver                   | -0.10 | -0.03  | -0.10 | -0.03 | -0.09 | -0.08  | 0.26  | -0.05 | -0.07   | 0.11  | -0.04  | -0.06 |
| n <sub>cap</sub> in lung                    | -0.01 | 0.00   | -0.01 | 0.00  | -0.01 | -0.01  | 0.00  | 0.49  | -0.01   | 0.01  | 0.00   | -0.01 |
| n <sub>cap</sub> in other tissues           | 0.00  | 0.00   | 0.00  | 0.00  | 0.00  | 0.00   | 0.00  | 0.00  | 0.00    | 0.00  | 0.00   | 0.00  |
| n <sub>cap</sub> in spleen                  | -0.03 | -0.01  | -0.03 | -0.01 | -0.03 | -0.03  | -0.01 | -0.01 | -0.02   | 0.04  | 0.27   | -0.02 |
| P                                           | -0.37 | 0.34   | -0.37 | 0.73  | 0.17  | 0.27   | 0.44  | 0.11  | -0.33   | 0.31  | 0.48   | -0.32 |
| X <sub>brain</sub>                          | 0.00  | 0.00   | 0.00  | 0.00  | 0.00  | 0.00   | 0.00  | 0.00  | 0.00    | 0.00  | 0.00   | 0.00  |
| X <sub>fast</sub>                           | 0.00  | 0.00   | 0.00  | 0.00  | 0.00  | 0.00   | 0.00  | 0.00  | 0.00    | 0.00  | 0.00   | 0.00  |
| X <sub>rest</sub>                           | -0.10 | -0.04  | -0.10 | -0.04 | 0.00  | -0.01  | -0.05 | -0.03 | 0.57    | 0.10  | -0.05  | -0.07 |
| f <sub>blood</sub> <sub>art</sub>           | 0.00  | 0.00   | 0.00  | 0.00  | 0.00  | 0.00   | 0.00  | 0.00  | 0.00    | 0.00  | 0.00   | 0.00  |
| f <sub>blood</sub> <sub>bone marrow</sub>   | 0.00  | 0.02   | 0.00  | 0.00  | 0.00  | 0.00   | 0.00  | 0.00  | 0.00    | 0.00  | 0.00   | 0.00  |
| f <sub>blood</sub> <sub>brain</sub>         | 0.00  | 0.00   | 1.00  | 0.00  | 0.00  | 0.00   | 0.00  | 0.00  | 0.00    | 0.00  | 0.00   | 0.00  |
| f <sub>blood</sub> <sub>heart</sub>         | 0.00  | 0.00   | 0.00  | 0.00  | 0.35  | 0.00   | 0.00  | 0.00  | 0.00    | 0.00  | 0.00   | 0.00  |
| f <sub>blood</sub> <sub>kidney</sub>        | 0.00  | 0.00   | 0.00  | 0.00  | 0.00  | 0.25   | 0.00  | 0.00  | 0.00    | 0.00  | 0.00   | 0.00  |
| f <sub>blood</sub> <sub>liver</sub>         | 0.00  | 0.00   | 0.00  | 0.00  | 0.00  | 0.00   | 0.04  | 0.00  | 0.00    | 0.00  | 0.00   | 0.00  |
| f <sub>blood</sub> <sub>lung</sub>          | 0.00  | 0.00   | 0.00  | 0.00  | 0.00  | 0.00   | 0.00  | 0.19  | 0.00    | 0.00  | 0.00   | 0.00  |
| f <sub>blood</sub> <sub>other tissues</sub> | 0.00  | 0.00   | 0.00  | 0.00  | 0.00  | 0.00   | 0.00  | 0.00  | 0.35    | 0.00  | 0.00   | 0.00  |
| f <sub>blood</sub> <sub>spleen</sub>        | 0.00  | 0.00   | 0.00  | 0.00  | 0.00  | 0.00   | 0.00  | 0.00  | 0.00    | 0.00  | 0.01   | 0.00  |
| f <sub>Q</sub> <sub>spleen</sub>            | 0.00  | 0.00   | 0.00  | 0.00  | 0.00  | 0.00   | 0.00  | 0.00  | -0.02   | 0.00  | 0.01   | 0.00  |
| f <sub>Q</sub> <sub>liver</sub>             | 0.03  | 0.01   | 0.03  | 0.02  | 0.03  | 0.03   | 0.02  | 0.01  | -0.19   | -0.03 | 0.01   | 0.02  |
| f <sub>Q</sub> <sub>brain</sub>             | 0.00  | 0.00   | 0.00  | 0.00  | 0.00  | 0.00   | 0.00  | 0.00  | -0.02   | 0.00  | 0.00   | 0.00  |
| f <sub>Q</sub> <sub>heart</sub>             | 0.01  | 0.00   | 0.01  | 0.00  | 0.09  | 0.01   | 0.00  | 0.00  | -0.05   | -0.01 | 0.00   | 0.01  |
| f <sub>Q</sub> <sub>kidney</sub>            | 0.02  | 0.01   | 0.02  | 0.01  | 0.02  | 0.10   | 0.01  | 0.01  | -0.14   | -0.03 | 0.01   | 0.02  |
| f <sub>Q</sub> <sub>bone marrow</sub>       | 0.00  | 0.01   | 0.00  | 0.00  | 0.00  | 0.00   | 0.00  | 0.00  | -0.03   | 0.00  | 0.00   | 0.00  |
| fRBI <sub>brain</sub>                       | 0.00  | 0.00   | 1.00  | 0.00  | 0.00  | 0.00   | 0.00  | 0.00  | 0.00    | 0.00  | 0.00   | 0.00  |
| fRBI <sub>tissue</sub>                      | 0.00  | 0.02   | 0.00  | 0.00  | 0.35  | 0.25   | 0.04  | 0.19  | 0.35    | 0.00  | 0.01   | 0.00  |
| fW <sub>blood</sub>                         | 0.48  | -0.33  | -0.52 | -0.68 | -0.52 | -0.51  | -0.43 | -0.27 | -0.61   | -0.41 | -0.45  | -0.61 |
| fW <sub>bone marrow</sub>                   | -0.20 | 0.91   | -0.20 | -0.12 | -0.18 | -0.18  | -0.11 | -0.09 | -0.18   | 0.18  | -0.11  | -0.15 |
| fW <sub>brain</sub>                         | 0.00  | 0.00   | 1.00  | 0.00  | 0.00  | 0.00   | 0.00  | 0.00  | 0.00    | 0.00  | 0.00   | 0.00  |
| fW <sub>heart</sub>                         | 0.00  | 0.00   | 0.00  | 0.00  | 0.91  | 0.00   | 0.00  | 0.00  | 0.00    | 0.00  | 0.00   | 0.00  |
| fW <sub>kidney</sub>                        | 0.00  | 0.00   | 0.00  | 0.00  | 0.00  | 0.91   | 0.00  | 0.00  | -0.01   | 0.00  | 0.00   | 0.00  |
| fW <sub>lung</sub>                          | -0.01 | -0.01  | -0.01 | -0.01 | -0.01 | -0.01  | -0.01 | 0.97  | -0.01   | 0.01  | -0.01  | -0.01 |
| fW <sub>liver</sub>                         | -0.29 | -0.12  | -0.29 | -0.16 | -0.27 | -0.26  | 0.84  | -0.14 | -0.26   | 0.28  | -0.15  | -0.22 |
| fW <sub>spleen</sub>                        | -0.11 | -0.04  | -0.11 | -0.05 | -0.10 | -0.09  | -0.05 | -0.05 | -0.09   | 0.11  | 0.94   | -0.07 |

**Table S7. Relative sensitivity coefficients for 30 nm at 90 d (end of experiment, 87 mg/kg)**

| AUC 90 days                                 | Bone  |        |       |       |       |        | Other |       |         |       |        |       |
|---------------------------------------------|-------|--------|-------|-------|-------|--------|-------|-------|---------|-------|--------|-------|
|                                             | Blood | marrow | Brain | Feces | Heart | Kidney | Lung  | Liver | tissues | PC    | Spleen | Urine |
| Body weight                                 | 1.19  | 1.07   | 1.13  | 0.18  | 1.08  | 1.06   | 1.03  | 1.09  | 0.94    | 1.00  | 1.10   | 0.18  |
| Dose rate                                   | 1.27  | 0.23   | 1.32  | 1.49  | 0.53  | 0.41   | 0.10  | 0.35  | 1.47    | 0.99  | 0.40   | 1.49  |
| Exposure duration                           | 1.27  | 0.23   | 1.32  | 1.49  | 0.53  | 0.41   | 0.10  | 0.35  | 1.47    | 0.99  | 0.40   | 1.49  |
| CL <sub>f</sub>                             | 0.00  | 0.00   | 0.00  | 1.00  | 0.00  | 0.00   | 0.00  | 0.00  | 0.00    | 0.00  | 0.00   | 0.00  |
| CL <sub>u</sub>                             | 0.00  | 0.00   | 0.00  | 0.00  | 0.00  | 0.00   | 0.00  | 0.00  | 0.00    | 0.00  | 0.00   | 1.00  |
| k <sub>ab0</sub>                            | -0.20 | 0.27   | -0.20 | -0.20 | -0.08 | -0.06  | 0.09  | 0.35  | -0.16   | 0.01  | -0.09  | -0.20 |
| k <sub>sab0</sub>                           | -0.05 | -0.01  | -0.05 | -0.06 | -0.02 | -0.02  | 0.00  | -0.01 | -0.06   | 0.00  | 0.46   | -0.06 |
| k <sub>de</sub>                             | 0.27  | -0.29  | 0.27  | 0.28  | 0.11  | 0.09   | -0.08 | -0.38 | 0.24    | -0.01 | -0.41  | 0.28  |
| M <sub>cap</sub>                            | -0.27 | 0.76   | -0.32 | -0.48 | 0.47  | 0.59   | 0.90  | 0.64  | -0.47   | 0.01  | 0.59   | -0.48 |
| n <sub>cap</sub> in blood                   | 0.00  | 0.00   | 0.00  | 0.00  | 0.00  | 0.00   | 0.00  | 0.00  | 0.00    | 0.00  | 0.00   | 0.00  |
| n <sub>cap</sub> in bone marrow             | -0.09 | 0.68   | -0.11 | -0.15 | -0.04 | -0.03  | 0.01  | 0.02  | -0.15   | 0.00  | 0.02   | -0.15 |
| n <sub>cap</sub> in brain                   | 0.00  | 0.00   | 0.00  | 0.00  | 0.00  | 0.00   | 0.00  | 0.00  | 0.00    | 0.00  | 0.00   | 0.00  |
| n <sub>cap</sub> in heart                   | 0.00  | 0.00   | 0.00  | 0.00  | 0.58  | 0.00   | 0.00  | 0.00  | 0.00    | 0.00  | 0.00   | 0.00  |
| n <sub>cap</sub> in kidney                  | 0.00  | 0.00   | 0.00  | 0.00  | 0.00  | 0.67   | 0.00  | 0.00  | 0.00    | 0.00  | 0.00   | 0.00  |
| n <sub>cap</sub> in liver                   | -0.12 | 0.06   | -0.15 | -0.23 | -0.05 | -0.04  | 0.02  | 0.61  | -0.23   | 0.00  | 0.05   | -0.23 |
| n <sub>cap</sub> in lung                    | -0.01 | 0.00   | -0.01 | -0.01 | 0.00  | 0.00   | 0.86  | 0.00  | -0.01   | 0.00  | 0.00   | -0.01 |
| n <sub>cap</sub> in other tissues           | -0.01 | -0.01  | -0.01 | 0.00  | 0.00  | 0.00   | 0.00  | -0.01 | 0.00    | 0.00  | -0.01  | 0.00  |
| n <sub>cap</sub> in spleen                  | -0.05 | 0.03   | -0.06 | -0.09 | -0.02 | -0.01  | 0.01  | 0.02  | -0.09   | 0.00  | 0.54   | -0.09 |
| P                                           | -0.26 | 0.27   | -0.26 | 0.72  | 0.17  | 0.16   | 0.10  | 0.34  | -0.23   | 0.00  | 0.37   | -0.27 |
| X <sub>brain</sub>                          | 0.00  | 0.00   | 0.22  | 0.00  | 0.00  | 0.00   | 0.00  | 0.00  | 0.00    | 0.00  | 0.00   | 0.00  |
| X <sub>fast</sub>                           | 0.00  | 0.00   | 0.00  | 0.00  | 0.00  | 0.00   | 0.00  | 0.00  | 0.00    | 0.00  | 0.00   | 0.00  |
| X <sub>rest</sub>                           | -0.72 | -0.28  | -0.71 | -0.69 | -0.30 | -0.23  | -0.12 | -0.36 | 0.26    | 0.01  | -0.38  | -0.69 |
| f <sub>blood</sub> <sub>art</sub>           | 0.00  | 0.00   | 0.00  | 0.00  | 0.00  | 0.00   | 0.00  | 0.00  | 0.00    | 0.00  | 0.00   | 0.00  |
| f <sub>blood</sub> <sub>bone marrow</sub>   | 0.00  | 0.00   | 0.00  | 0.00  | 0.00  | 0.00   | 0.00  | 0.00  | 0.00    | 0.00  | 0.00   | 0.00  |
| f <sub>blood</sub> <sub>brain</sub>         | 0.00  | 0.00   | 0.77  | 0.00  | 0.00  | 0.00   | 0.00  | 0.00  | 0.00    | 0.00  | 0.00   | 0.00  |
| f <sub>blood</sub> <sub>heart</sub>         | 0.00  | 0.00   | 0.00  | 0.00  | 0.14  | 0.00   | 0.00  | 0.00  | 0.00    | 0.00  | 0.00   | 0.00  |
| f <sub>blood</sub> <sub>kidney</sub>        | 0.00  | 0.00   | 0.00  | 0.00  | 0.00  | 0.08   | 0.00  | 0.00  | 0.00    | 0.00  | 0.00   | 0.00  |
| f <sub>blood</sub> <sub>liver</sub>         | 0.00  | 0.00   | 0.00  | 0.00  | 0.00  | 0.00   | 0.00  | 0.00  | 0.00    | 0.00  | 0.00   | 0.00  |
| f <sub>blood</sub> <sub>lung</sub>          | 0.00  | 0.00   | 0.00  | 0.00  | 0.00  | 0.00   | 0.01  | 0.00  | 0.00    | 0.00  | 0.00   | 0.00  |
| f <sub>blood</sub> <sub>other tissues</sub> | 0.00  | 0.00   | 0.00  | 0.00  | 0.00  | 0.00   | 0.00  | 0.00  | 0.00    | 0.00  | 0.00   | 0.00  |
| f <sub>blood</sub> <sub>spleen</sub>        | 0.00  | 0.00   | 0.00  | 0.00  | 0.00  | 0.00   | 0.00  | 0.00  | 0.00    | 0.00  | 0.00   | 0.00  |
| fQ <sub>spleen</sub>                        | 0.02  | 0.01   | 0.02  | 0.02  | 0.01  | 0.01   | 0.00  | 0.01  | -0.01   | 0.00  | 0.01   | 0.02  |
| fQ <sub>liver</sub>                         | 0.24  | 0.09   | 0.23  | 0.23  | 0.10  | 0.08   | 0.04  | 0.12  | -0.08   | 0.00  | 0.12   | 0.23  |
| fQ <sub>brain</sub>                         | 0.03  | 0.01   | 0.25  | 0.03  | 0.01  | 0.01   | 0.00  | 0.01  | -0.01   | 0.00  | 0.01   | 0.02  |
| fQ <sub>heart</sub>                         | 0.07  | 0.03   | 0.06  | 0.06  | 0.03  | 0.02   | 0.01  | 0.03  | -0.02   | 0.00  | 0.03   | 0.06  |
| fQ <sub>kidney</sub>                        | 0.18  | 0.07   | 0.18  | 0.17  | 0.08  | 0.06   | 0.03  | 0.09  | -0.06   | 0.00  | 0.10   | 0.17  |
| fQ <sub>bone marrow</sub>                   | 0.03  | 0.01   | 0.03  | 0.03  | 0.01  | 0.01   | 0.01  | 0.02  | -0.01   | 0.00  | 0.02   | 0.03  |
| fRBI <sub>brain</sub>                       | 0.00  | 0.00   | 0.77  | 0.00  | 0.00  | 0.00   | 0.00  | 0.00  | 0.00    | 0.00  | 0.00   | 0.00  |
| fRBI <sub>tissue</sub>                      | 0.00  | 0.00   | 0.00  | 0.00  | 0.14  | 0.08   | 0.01  | 0.00  | 0.00    | 0.00  | 0.00   | 0.00  |
| fW <sub>blood</sub>                         | 0.99  | 0.01   | -0.01 | -0.03 | 0.00  | 0.00   | 0.01  | 0.02  | -0.03   | -0.01 | 0.01   | -0.03 |
| fW <sub>bone marrow</sub>                   | -0.14 | 1.01   | -0.16 | -0.21 | -0.06 | -0.05  | 0.00  | 0.00  | -0.21   | 0.00  | -0.01  | -0.21 |
| fW <sub>brain</sub>                         | 0.00  | 0.00   | 0.78  | 0.00  | 0.00  | 0.00   | 0.00  | 0.00  | 0.00    | 0.00  | 0.00   | 0.00  |
| fW <sub>heart</sub>                         | 0.00  | 0.00   | 0.00  | 0.00  | 1.00  | 0.00   | 0.00  | 0.00  | 0.00    | 0.00  | 0.00   | 0.00  |
| fW <sub>kidney</sub>                        | 0.00  | 0.00   | 0.00  | 0.00  | 0.00  | 1.00   | 0.00  | 0.00  | 0.00    | 0.00  | 0.00   | 0.00  |
| fW <sub>lung</sub>                          | -0.01 | 0.00   | -0.01 | -0.01 | 0.00  | 0.00   | 1.00  | 0.00  | -0.01   | 0.00  | 0.00   | -0.01 |
| fW <sub>liver</sub>                         | -0.23 | 0.04   | -0.26 | -0.36 | -0.10 | -0.07  | 0.02  | 1.02  | -0.36   | 0.00  | 0.01   | -0.36 |
| fW <sub>spleen</sub>                        | -0.10 | 0.02   | -0.11 | -0.15 | -0.04 | -0.03  | 0.01  | 0.01  | -0.15   | 0.00  | 1.01   | -0.15 |

## Calibration 5 nm

A

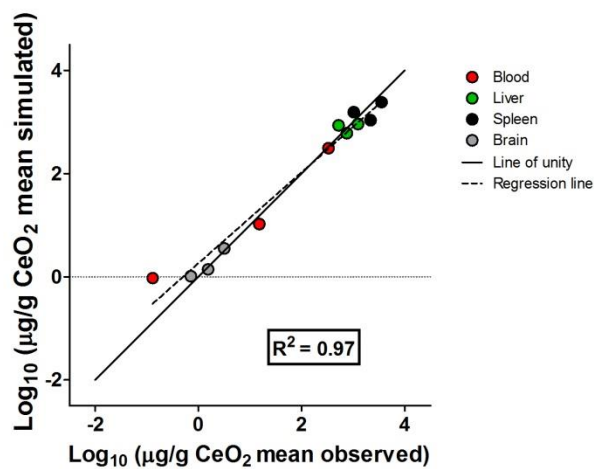

B

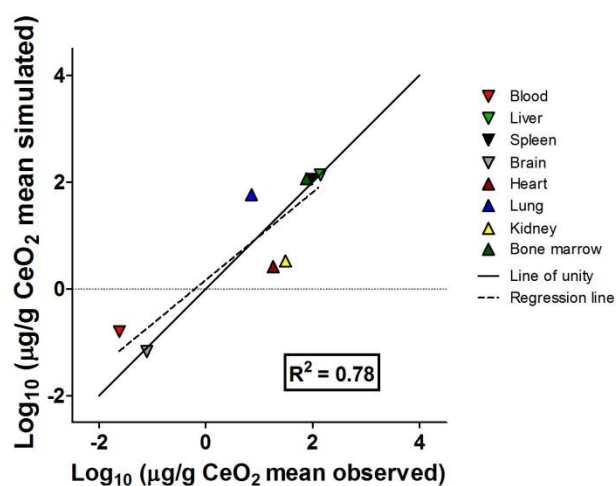

**Figure S1. Observed versus simulated concentrations in tissues.**

PBPK model calibration of 5 nm ceria. (A) Compares logs of simulated and observed mean concentration in different tissues of rats at various time-points, following 1 h *iv* infusion of 85 mg/kg body weight.<sup>2</sup> (B) Comparison of logs of simulated and observed mean concentration in different tissues of rats, 30 days after 1 h *iv* infusion of 11 mg/kg body weight.<sup>3</sup>

## Comparison of the 5 nm calibrated PBPK model to independent data set with 3 nm nanoceria

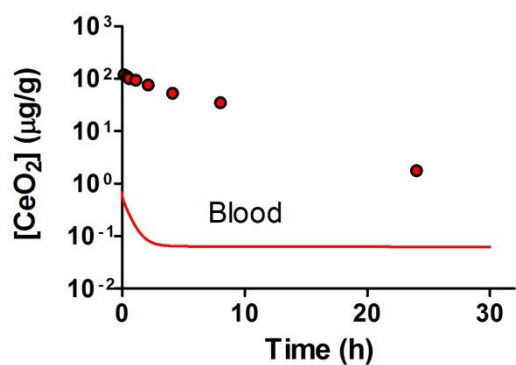

**Figure S2. Observed versus simulated concentrations in blood.**

Comparison of the 5 nm calibrated PBPK model against independent data set with 3-nm ceria. Simulated (solid curve) and observed (symbols) time courses of the nanoceria concentration in blood following an *iv* bolus dose of 10 mg/kg body weight.<sup>4</sup>

## Comparison of the 30 nm calibrated PBPK model to independent data sets with nanoceria around 30 nm

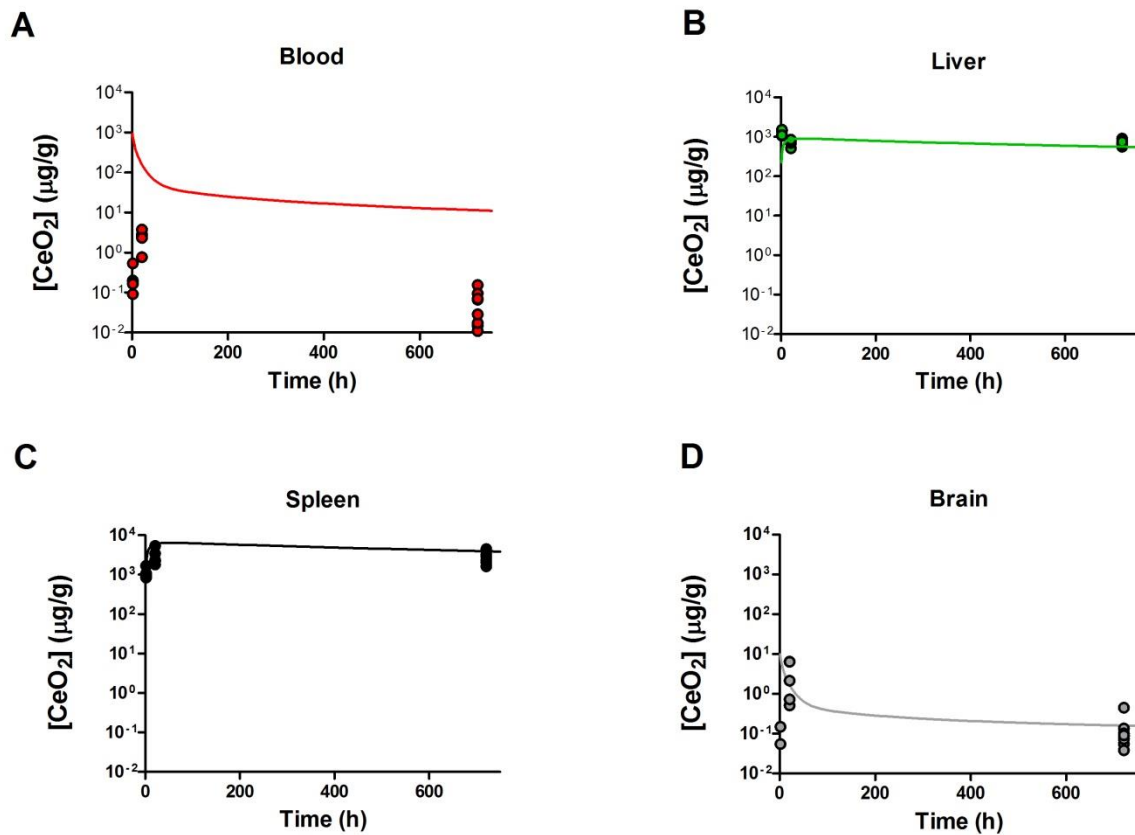

**Figure S3. Observed versus simulated concentrations in tissues (Yokel *et al.* 2013)**

Comparison of the 30 nm calibrated PBPK model against independent data set with 30 nm ceria. (A) Simulated (solid curves) and observed (symbols) time courses of the nanoceria concentration in different tissues following *iv* infusion of 85 mg/kg body weight during 1 h.<sup>2</sup>

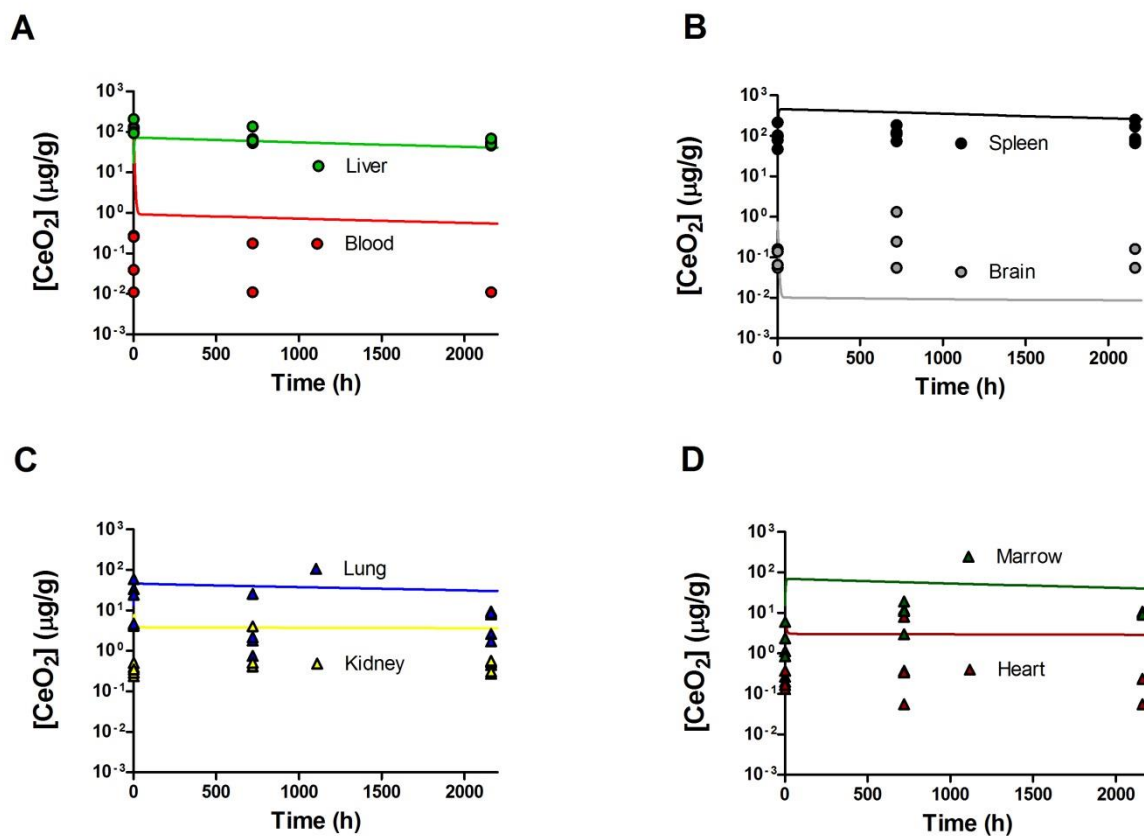

**Figure S4. Observed versus simulated concentrations in tissues (Yokel *et al.* 2014)**

Comparison of the 30 nm calibrated PBPK model against independent data set with 30 nm ceria. Simulated (solid curves) and observed (symbols) time courses of the nanoceria concentration in different tissues following *iv* infusion of 6 mg/kg body weight during 1 h.<sup>3</sup>

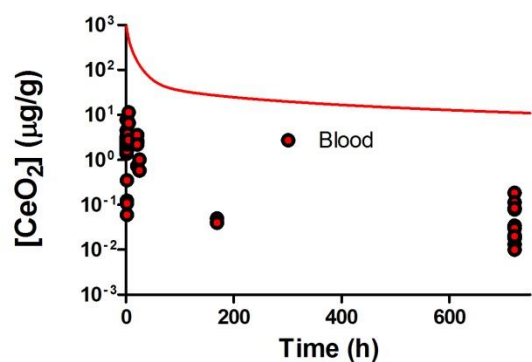

**Figure S5. Observed versus simulated concentrations in blood (Dan *et al.* 2012)**

Comparison of the 30 nm calibrated PBPK model against independent data set with 30 nm ceria. Simulated (solid curves) and observed (symbols) time courses of the nanoceria concentration in blood following *iv* infusion of 85 mg/kg body weight during 1 h.<sup>5</sup>

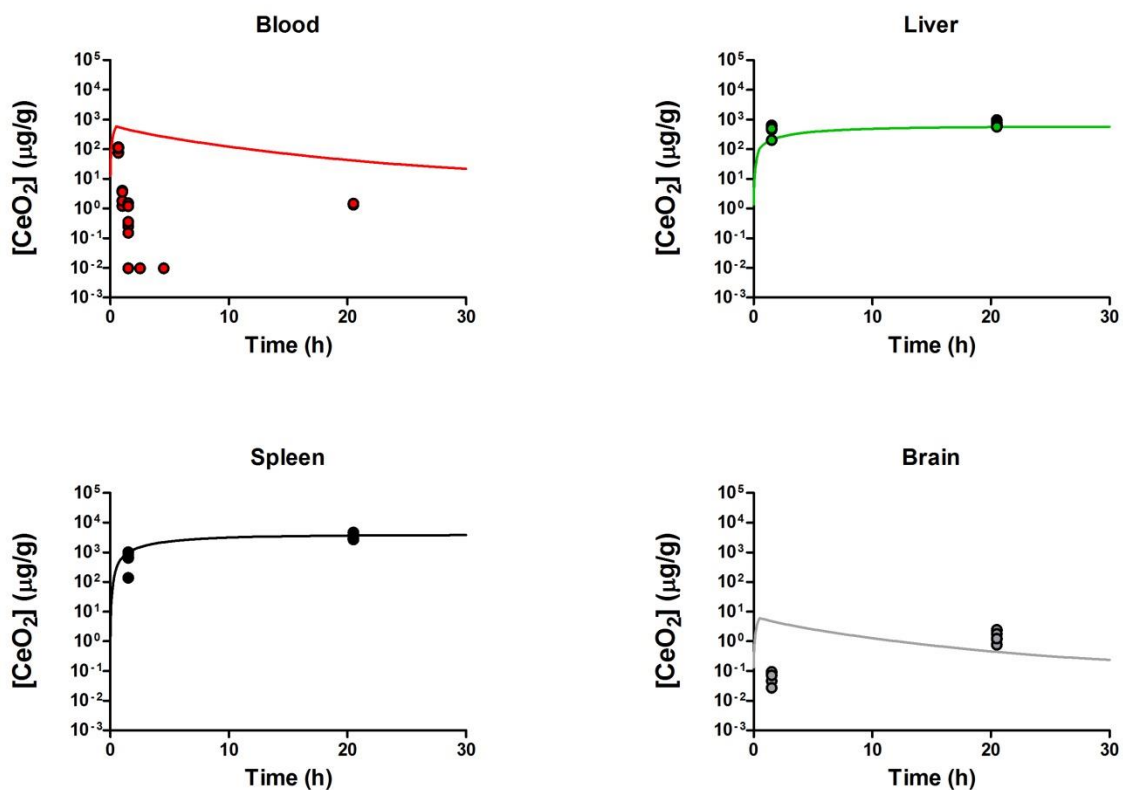

**Figure S6. Observed versus simulated concentrations in tissues (Yokel *et al.* 2009 – 50 mg/kg)**

Comparison of the 30 nm calibrated PBPK model against independent data sets with 30 nm ceria. Simulated (solid curves) and observed (symbols) time courses of the nanoceria concentration in different tissues following *iv* infusion of 50 mg/kg during 0.5 h.<sup>6</sup>



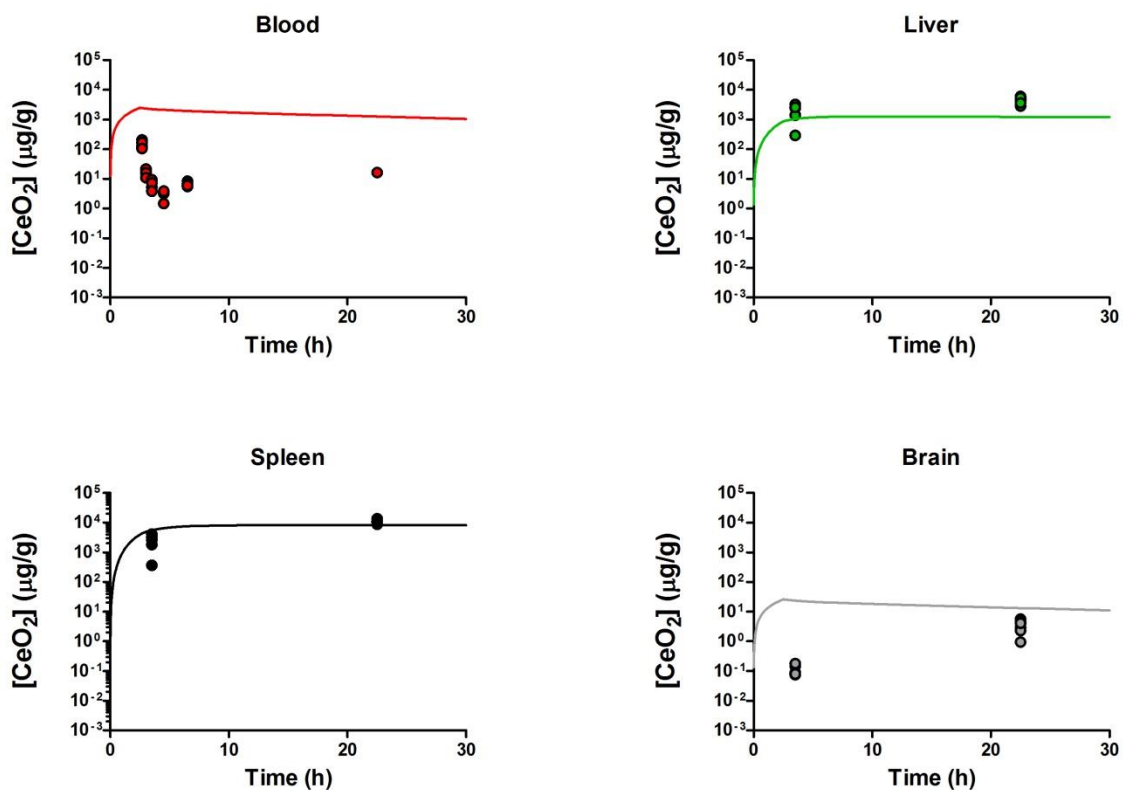

**Figure S7. Observed versus simulated concentrations in tissues (Yokel *et al.* 2009 – 250 mg/kg)**

Comparison of the 30 nm calibrated PBPK model against independent data set with 30 nm ceria. (A-D) Simulated (solid curves) and observed (symbols) time courses of the nanoceria concentration in different tissues following *iv* infusion of 250 mg/kg during 2.5 h.<sup>6</sup>

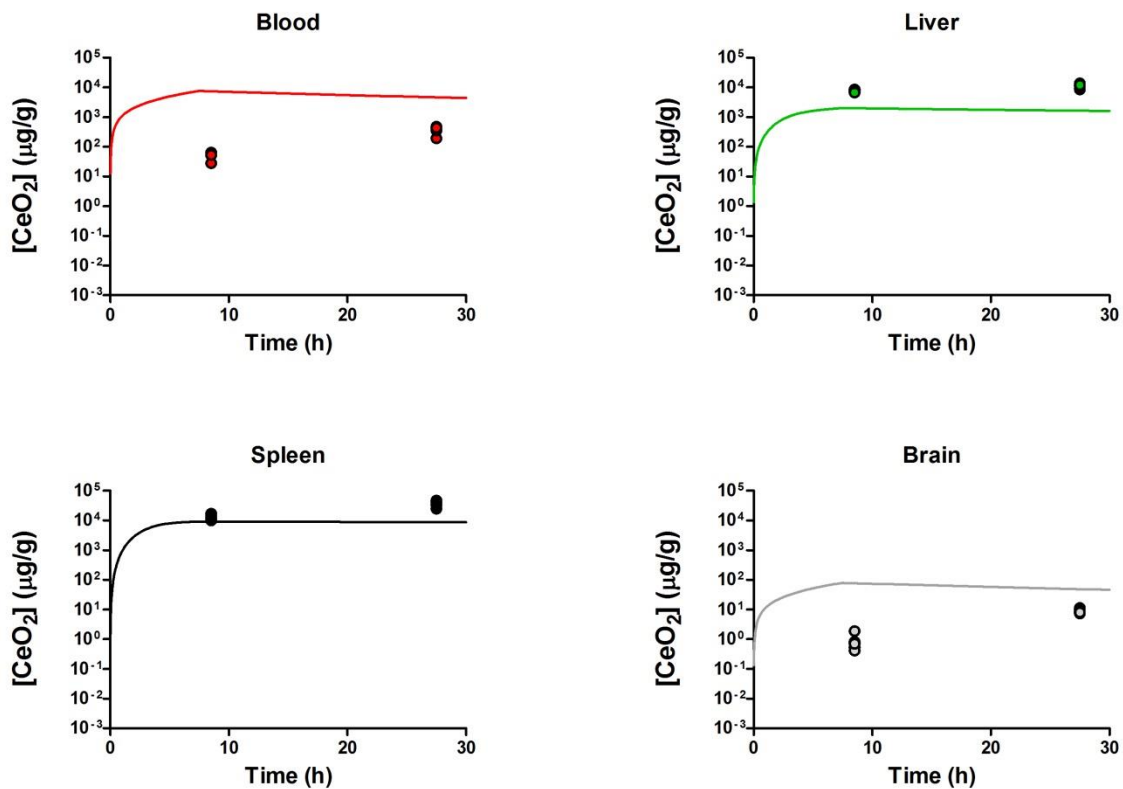

**Figure S8. Observed versus simulated concentrations in tissues (Yokel *et al.* 2009 – 750 mg/kg)**

Comparison of the 30 nm calibrated PBPK model against independent data set with 30 nm ceria. Simulated (solid curves) and observed (symbols) time courses of the nanoceria concentration in different tissues following *iv* infusion of 750 mg/kg during 7.5 h. <sup>6</sup>

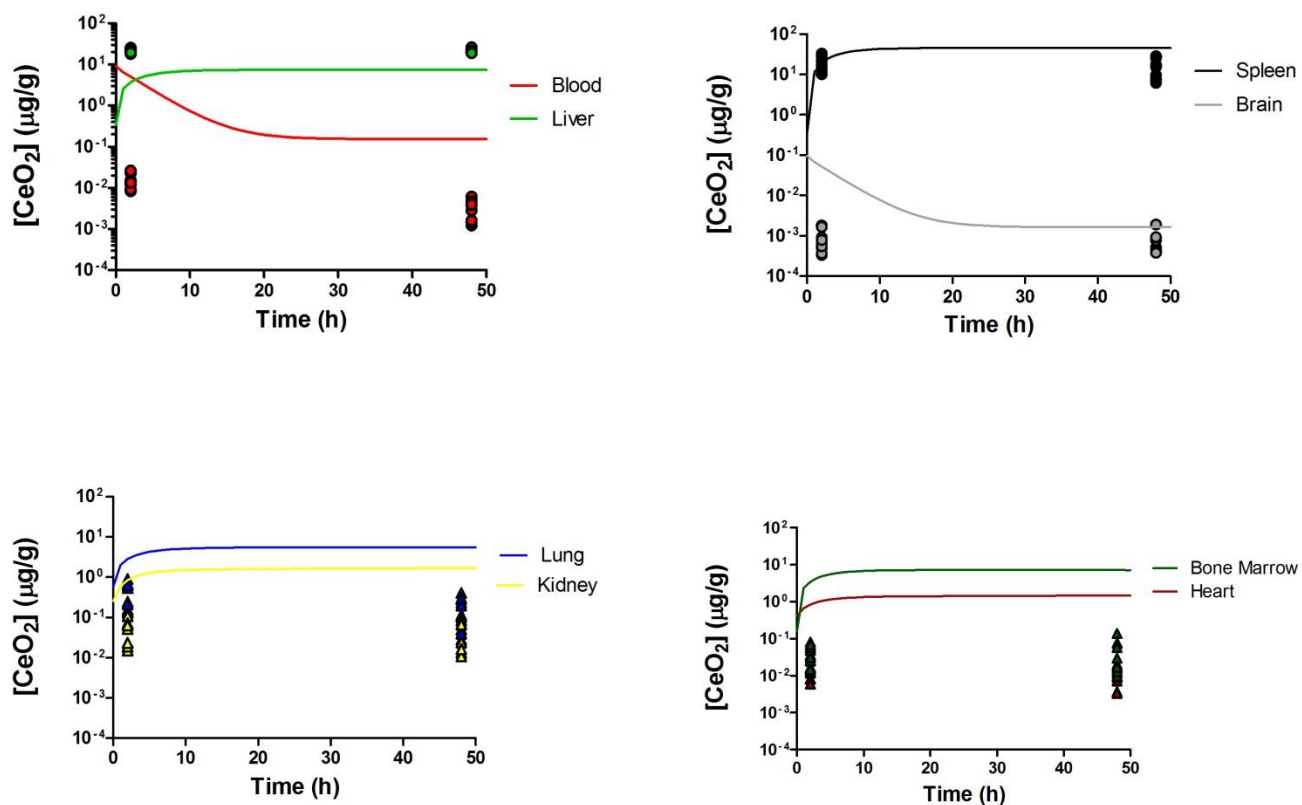

**Figure S9. Observed versus simulated concentrations in tissues (Konduru *et al.* 2015 – Silica coated CeO<sub>2</sub>)**

Comparison of the 30 nm calibrated PBPK model against independent data set with 30 nm ceria. Simulated (solid curves) and observed (symbols) time courses of the nanoceria concentration in different tissues following an *iv* bolus dose of 1 mg/kg body weight.<sup>7</sup>

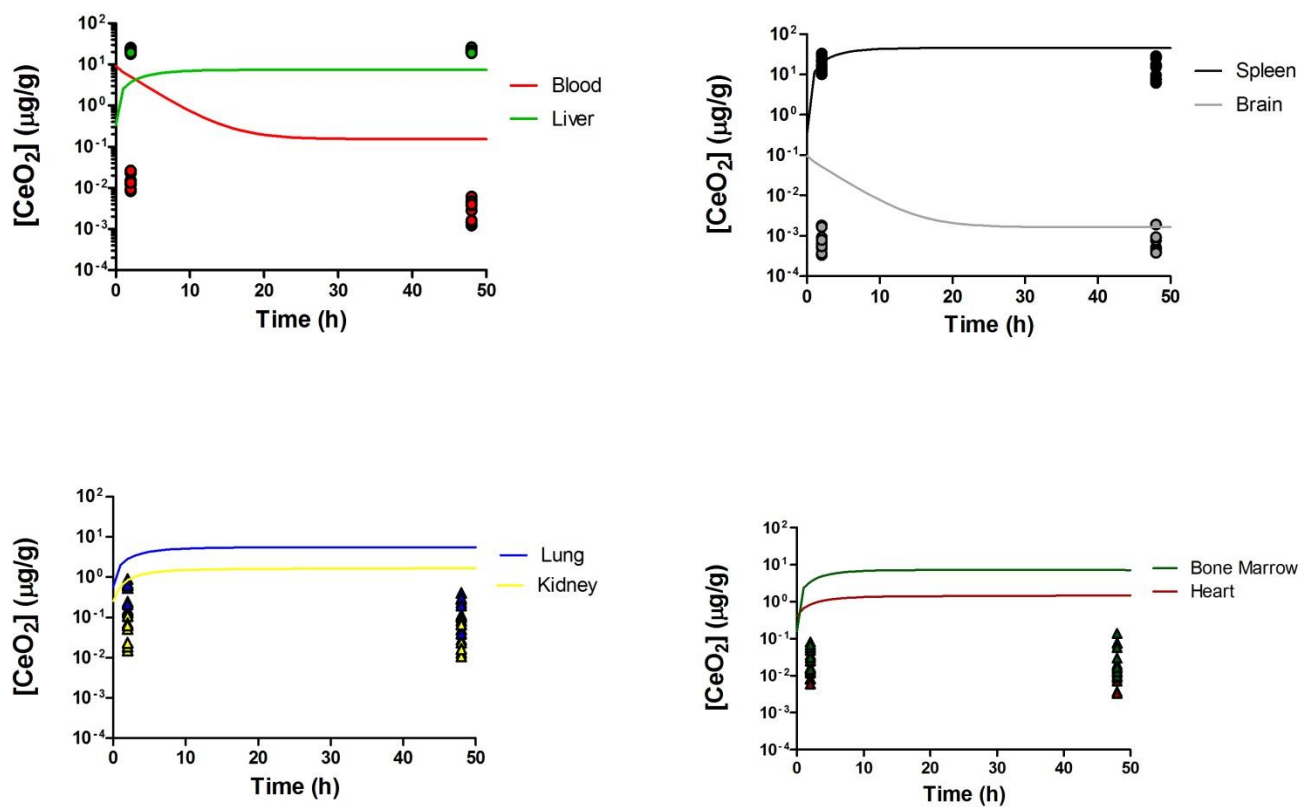

**Figure S10. Observed versus simulated concentrations in tissues (Konduru *et al.* 2015 –  $CeO_2$ )**

Comparison of the 30 nm calibrated PBPK model against independent data set with 30 nm nanoceria. Simulated (solid curves) and observed (symbols) time courses of the nanoceria concentration in different tissues following an iv bolus dose of 1 mg/kg body weight.<sup>7</sup>

## Comparison of the 5 nm calibrated PBPK to independent data sets with 15 nm ceria

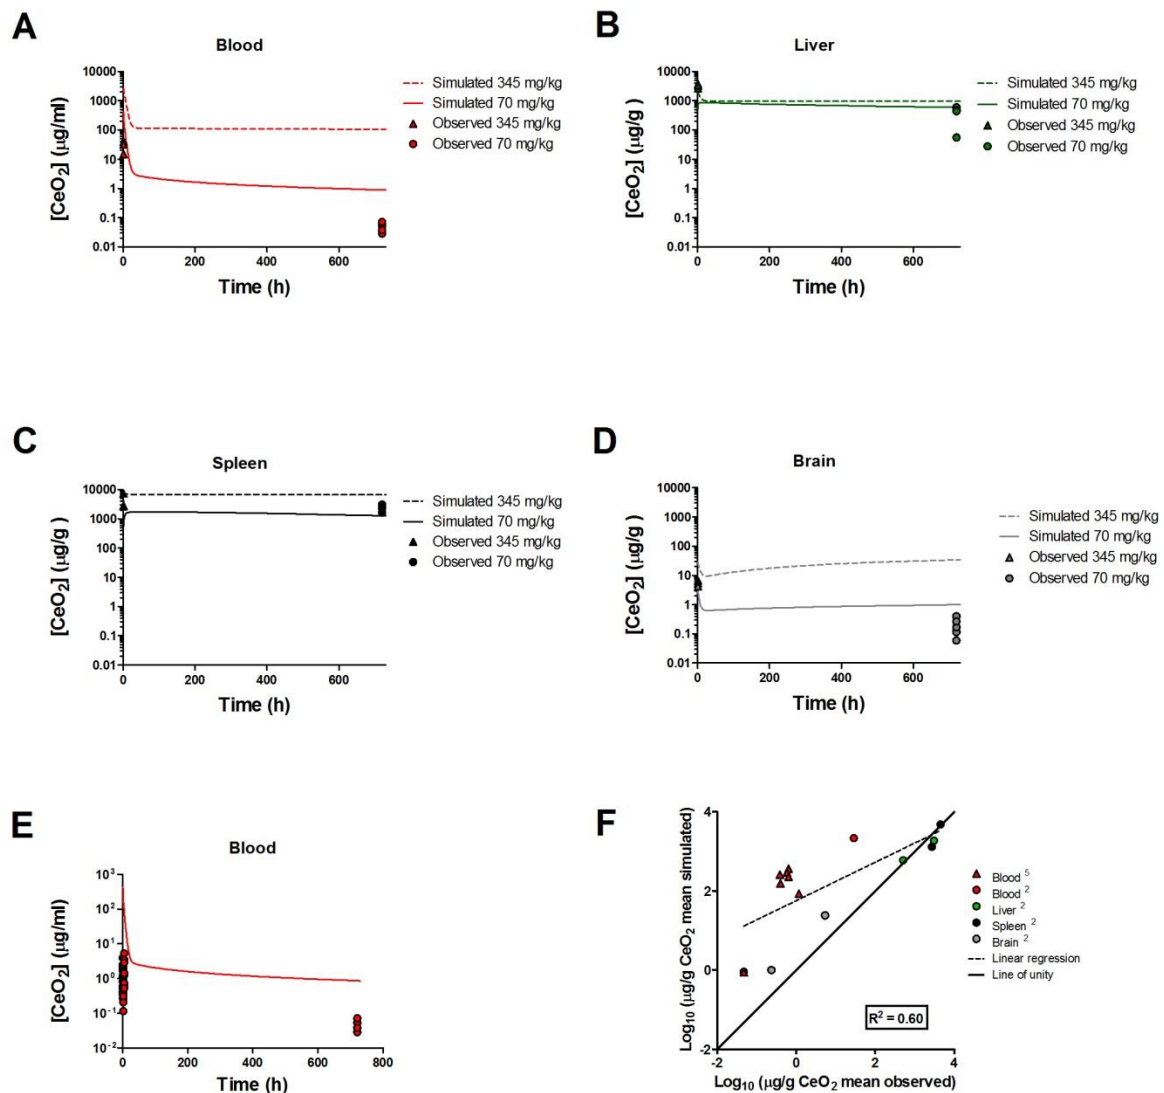

**Figure S11. Observed versus simulated concentrations in tissues following administration of 15 nm ceria.**

Comparison of the 5 nm calibrated PBPK model against independent data sets with 15 nm ceria. (A-E) Simulated (solid curve) and observed (symbols) time courses of the 15 nm ceria concentration following 1 h *iv* infusion of 70 mg/kg body weight. (A-D)<sup>2</sup> (E)<sup>5</sup> (F) Comparison of logs of simulated and observed mean concentration in different tissues. The line of unity (solid) represents a perfect match and the regression line (R<sup>2</sup>, dashed) describes the outcome.

## Comparison of the 5 nm calibrated PBPK to independent data sets with 55 nm ceria

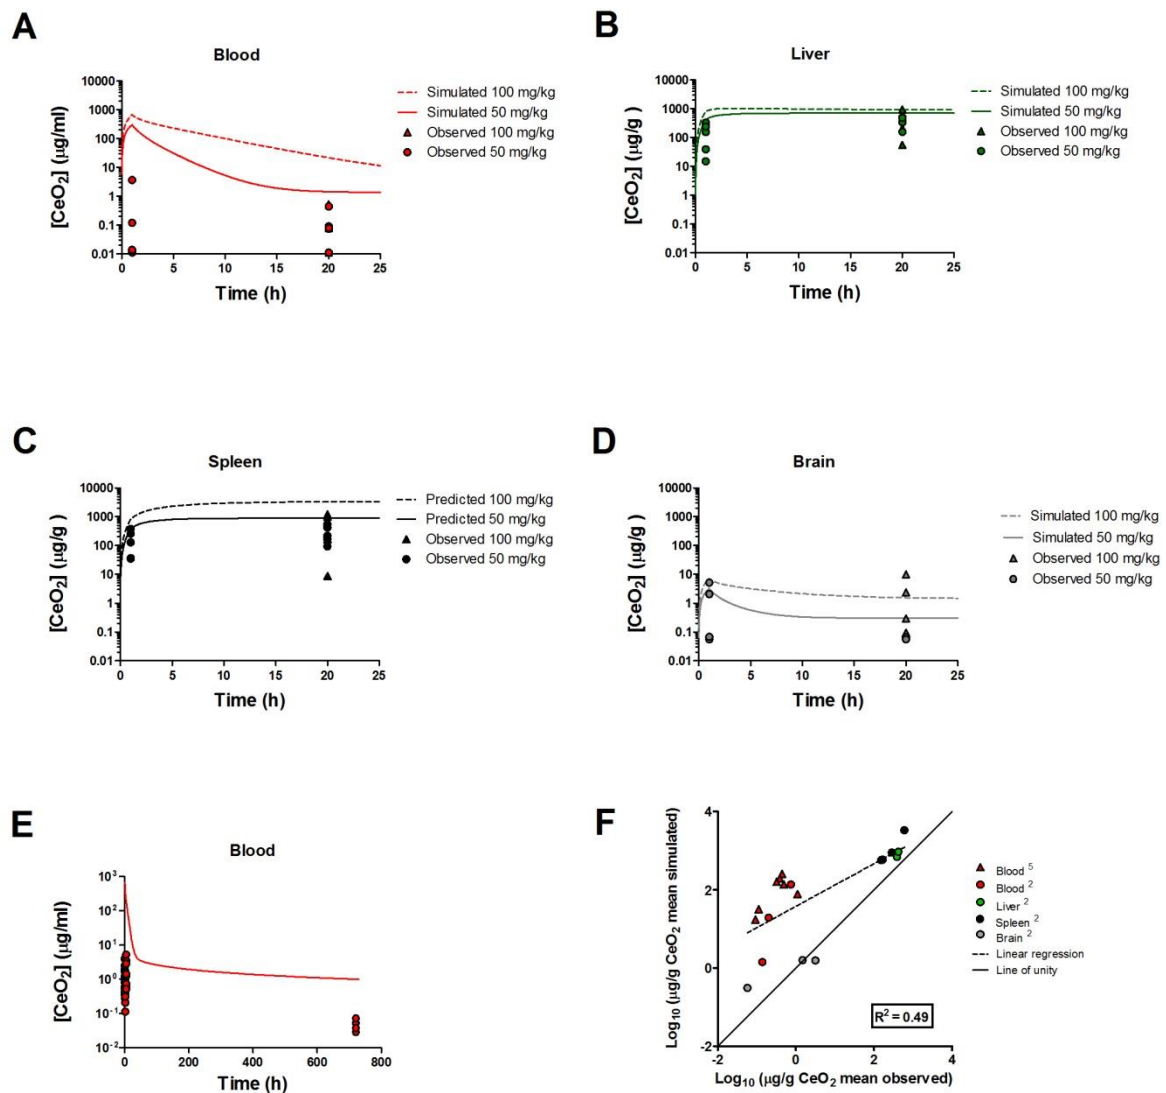

**Figure S12. Observed versus simulated concentrations in tissues for 55 nm ceria.**

Comparison of the 5 nm calibrated PBPK model against independent data sets with 55 nm ceria. (A-E) Simulated (solid curves) and observed (symbols) time courses of the 55 nm ceria concentration following 1 h *iv* infusion of 50 or 100 mg/kg body weight. (A-D)<sup>2</sup> (E)<sup>5</sup> (F) Comparison of logs of simulated and observed mean concentration in different tissues. The line of unity (solid) represents a perfect match and the regression line (R<sup>2</sup>, dashed) describes the outcome.

# Tissue: liver concentration ratios

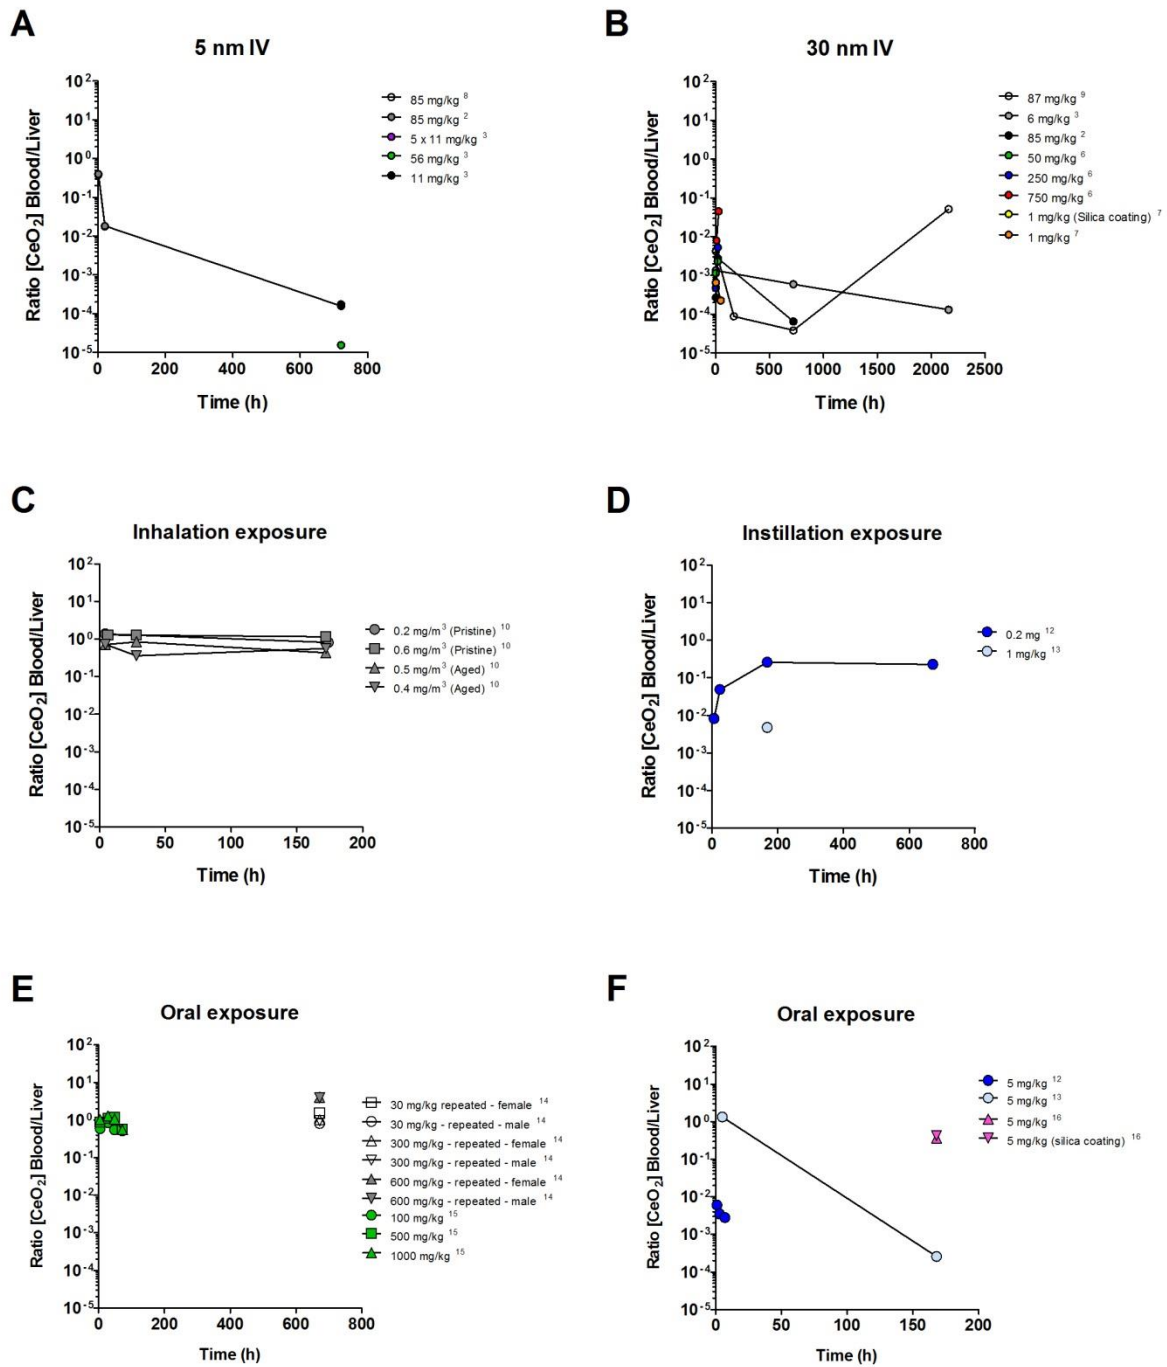

**Figure S13. Blood:liver concentration ratios.**

Time courses for blood:liver concentration ratios for (A) *iv* administered 5 nm ceria,<sup>2,3,8</sup> (B) *iv* administered 30 nm ceria,<sup>2,3,6,7,9</sup> (C) inhaled nanoceria,<sup>10,11</sup> (D) *it* instilled nanoceria,<sup>12,13</sup> and (E - F) orally administered nanoceria.<sup>12-16</sup>

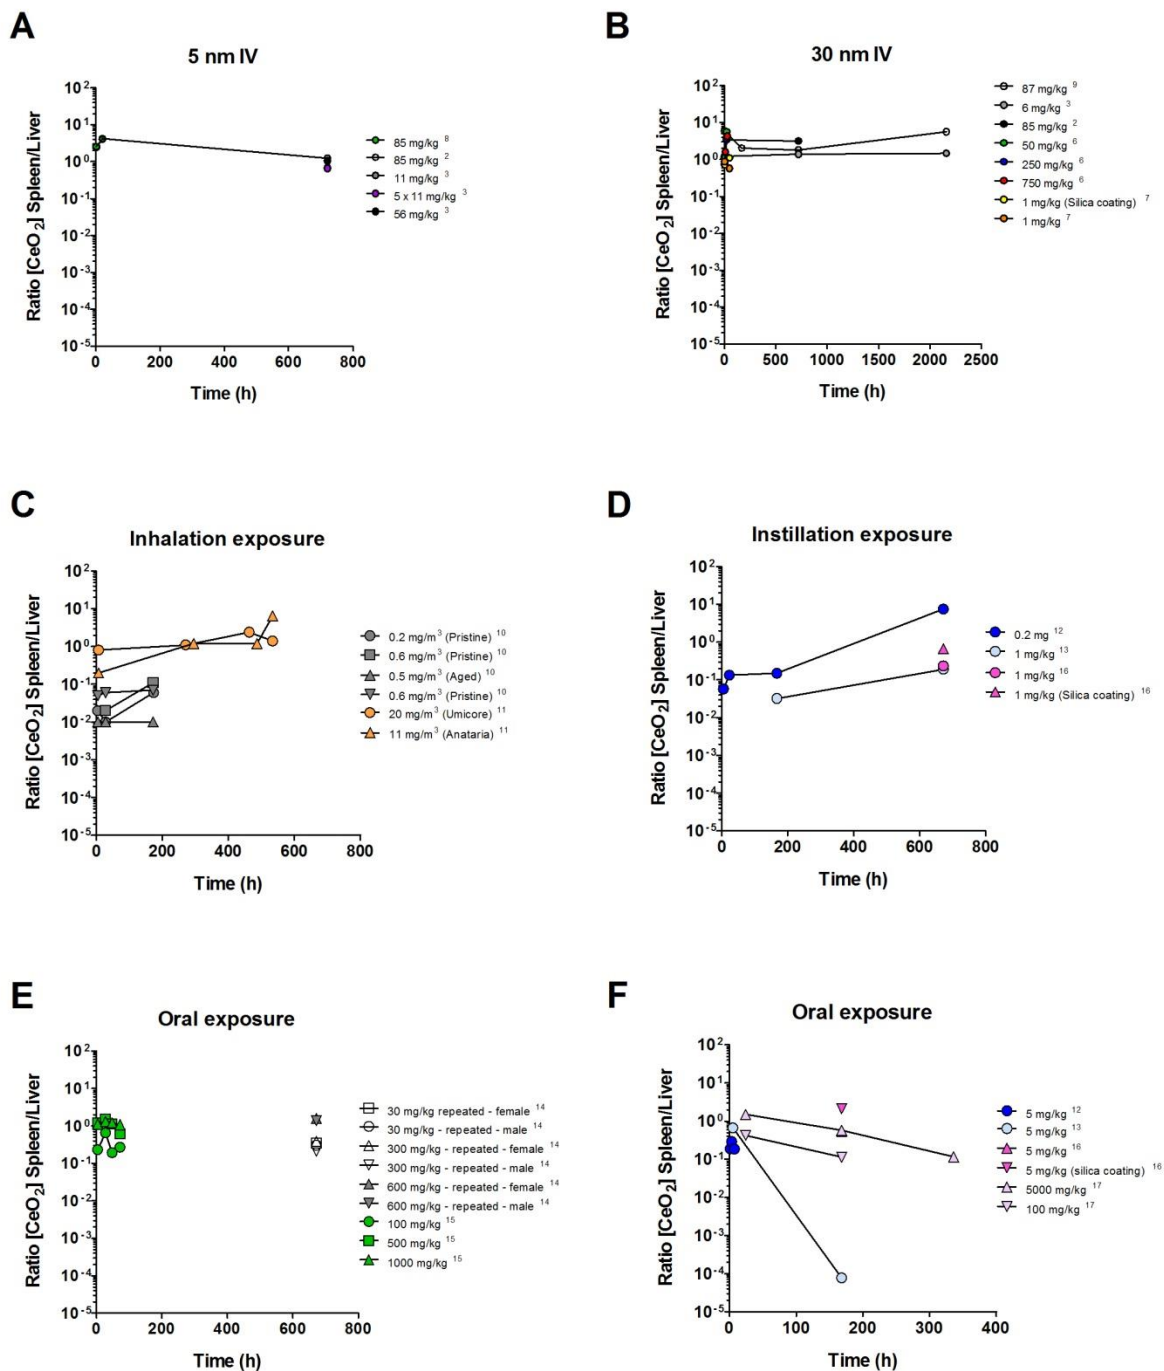

**Figure S14. Spleen:liver concentration ratios.**

Time courses for spleen:liver concentration ratios for (A) *iv* administered 5 nm ceria,<sup>2,3,8</sup> (B) *iv* administered 30 nm ceria,<sup>2,3,6,7,9</sup> (C) inhaled nanoceria,<sup>10,11</sup> (D) *it* instilled nanoceria,<sup>12,13</sup> and (E -F) orally administered nanoceria.<sup>12-17</sup>



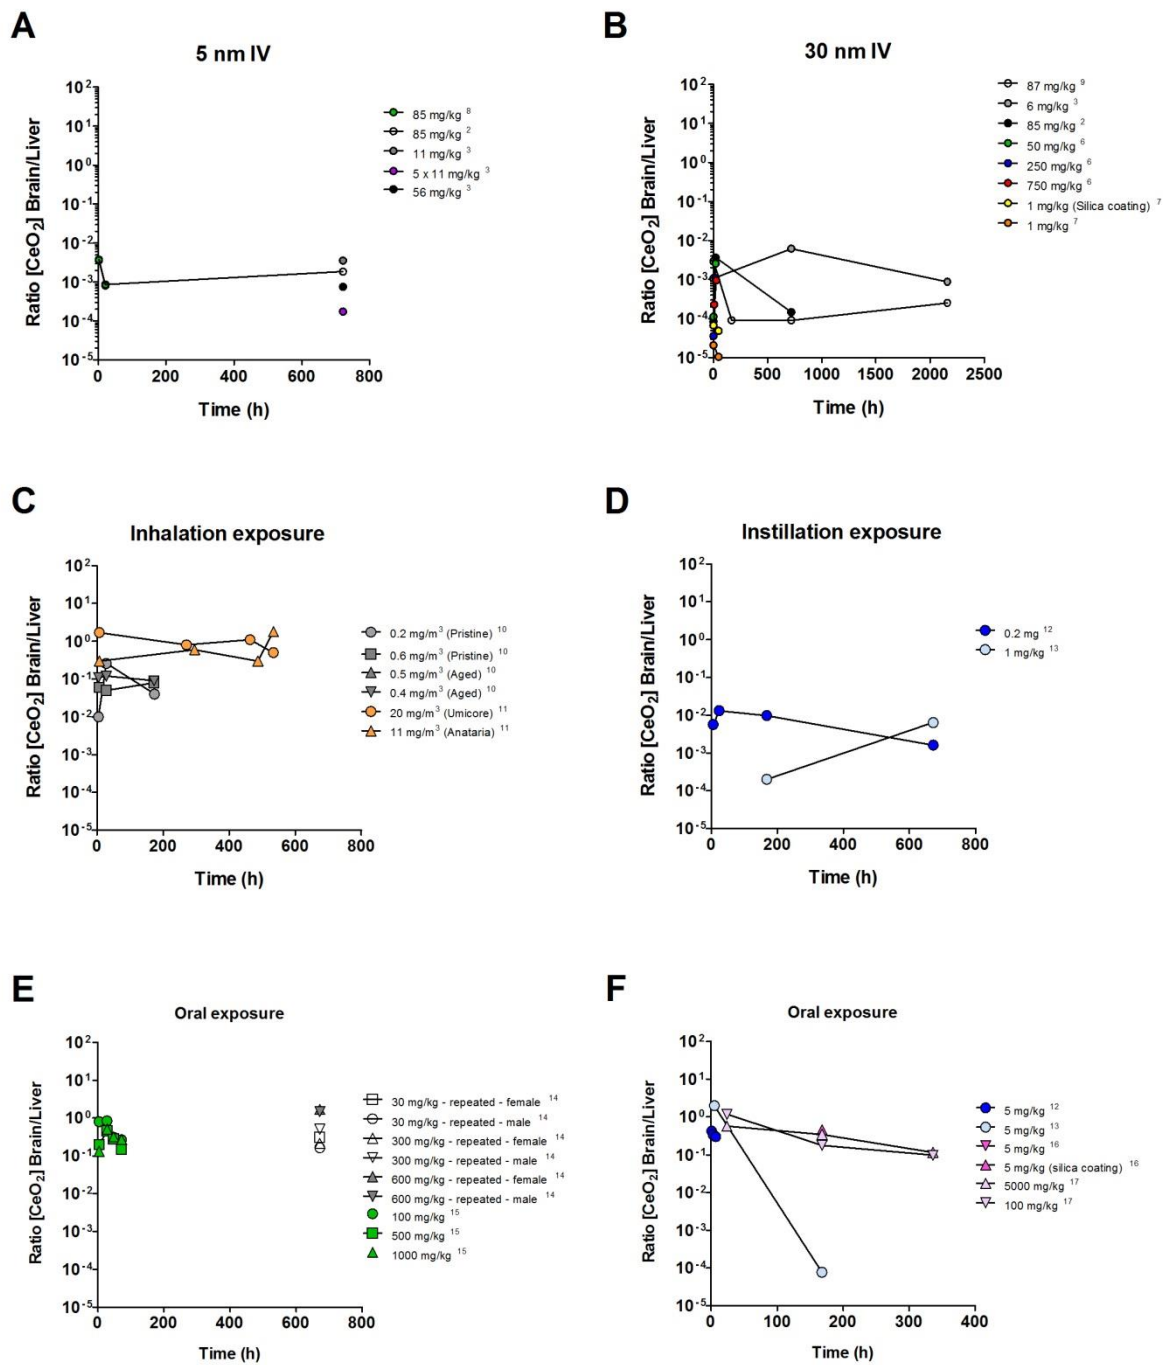

**Figure S15. Brain:liver concentration ratios.**

Plot of time courses for brain:liver concentration ratios for (A) *iv* administered 5 nm ceria,<sup>2,3,8</sup> (B) *iv* administered 30 nm ceria,<sup>2,3,6,7,9</sup> (C) inhaled nanoceria,<sup>10,11</sup> (D) *it* instilled nanoceria,<sup>12,13</sup> and (E - F) orally administered nanoceria.<sup>12-17</sup>

## Calibration oral administration

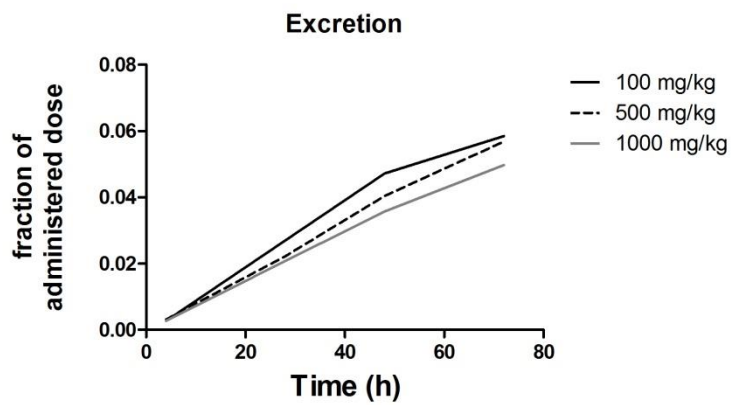

**Figure S16. Observed versus simulated concentrations in feces (Kumari *et al.* 2014)**

Calibration of the PBPK model against independent data sets with nanoceria was not performed because levels recovered in excretion were only a fraction of the administered dose. Figure presents the time courses of the fraction of the administered dose observed in feces following oral doses of 100, 500 and 1000 mg/kg.<sup>15</sup>

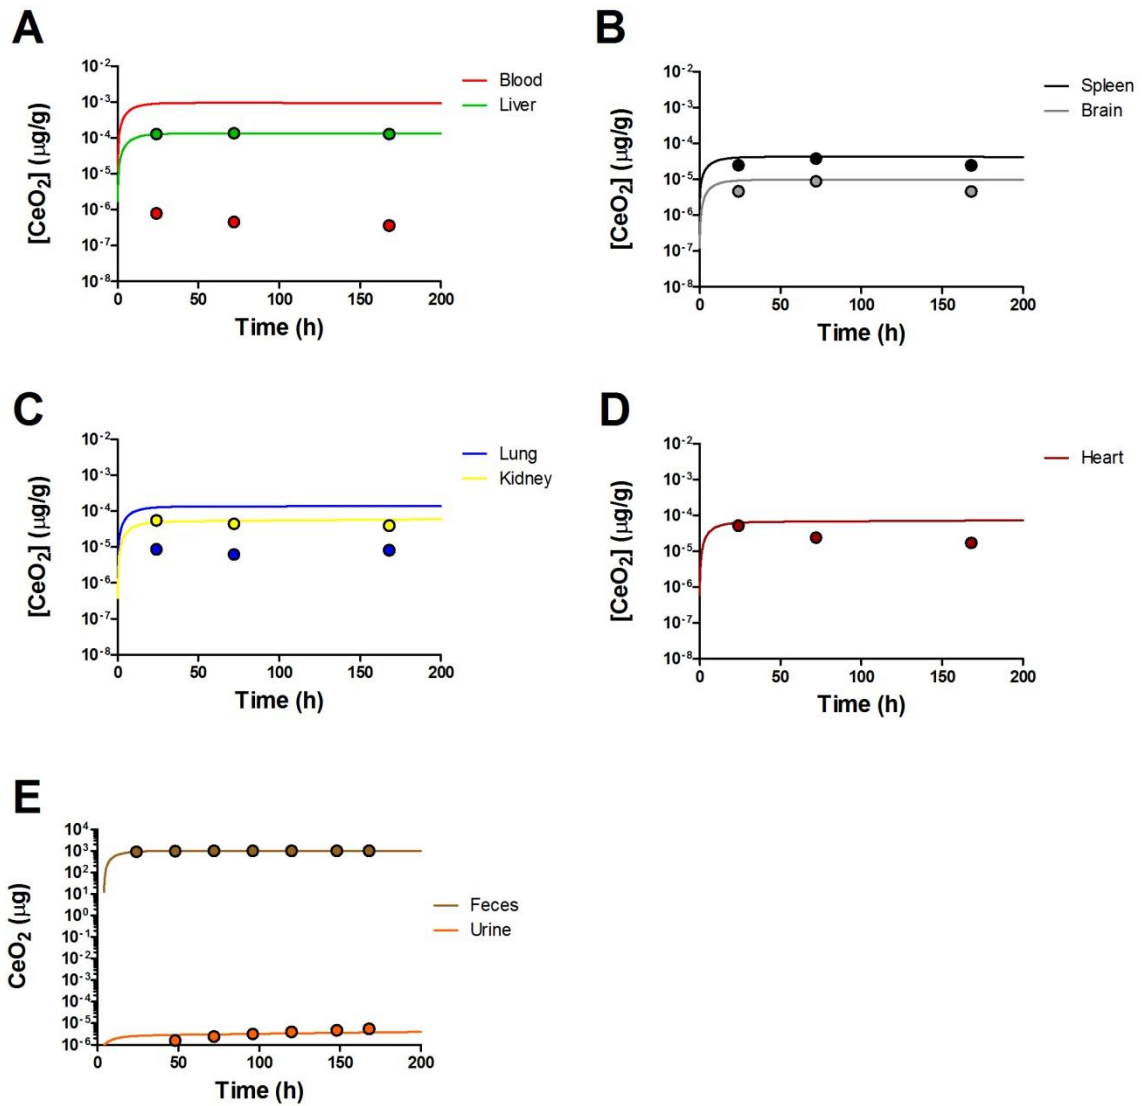

**Figure S17. Observed versus simulated concentrations in tissues (He *et al.* 2010)**

Calibration of the PBPK model against independent data sets with nanoceria. (A-E) Simulated (solid curves) and observed (symbols) time courses of the nanoceria concentration in different tissues following an oral dose of 5 mg/kg.<sup>12</sup>

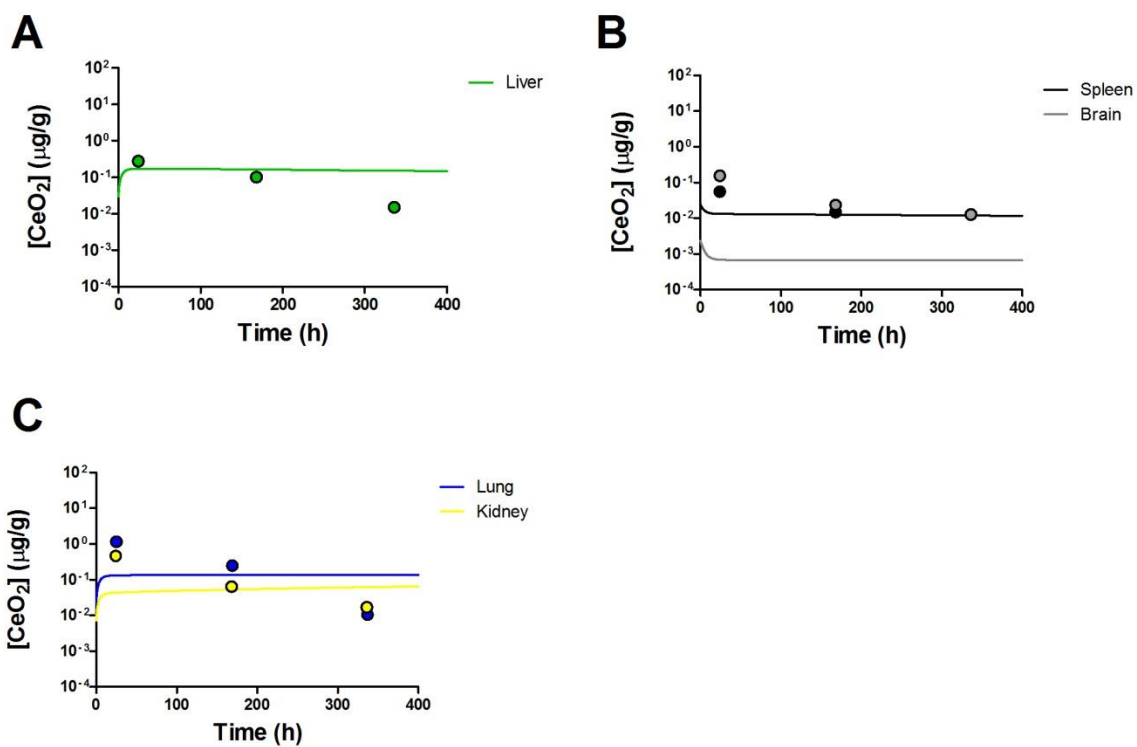

**Figure S18. Observed versus simulated concentrations in tissues (Park *et al.* 2009)**

Calibration of the PBPK model against independent data sets with nanoceria. (A-C) Simulated (solid curves) and observed (symbols) time courses of the nanoceria concentration in different tissues following an oral dose of 5000 mg/kg.<sup>17</sup>

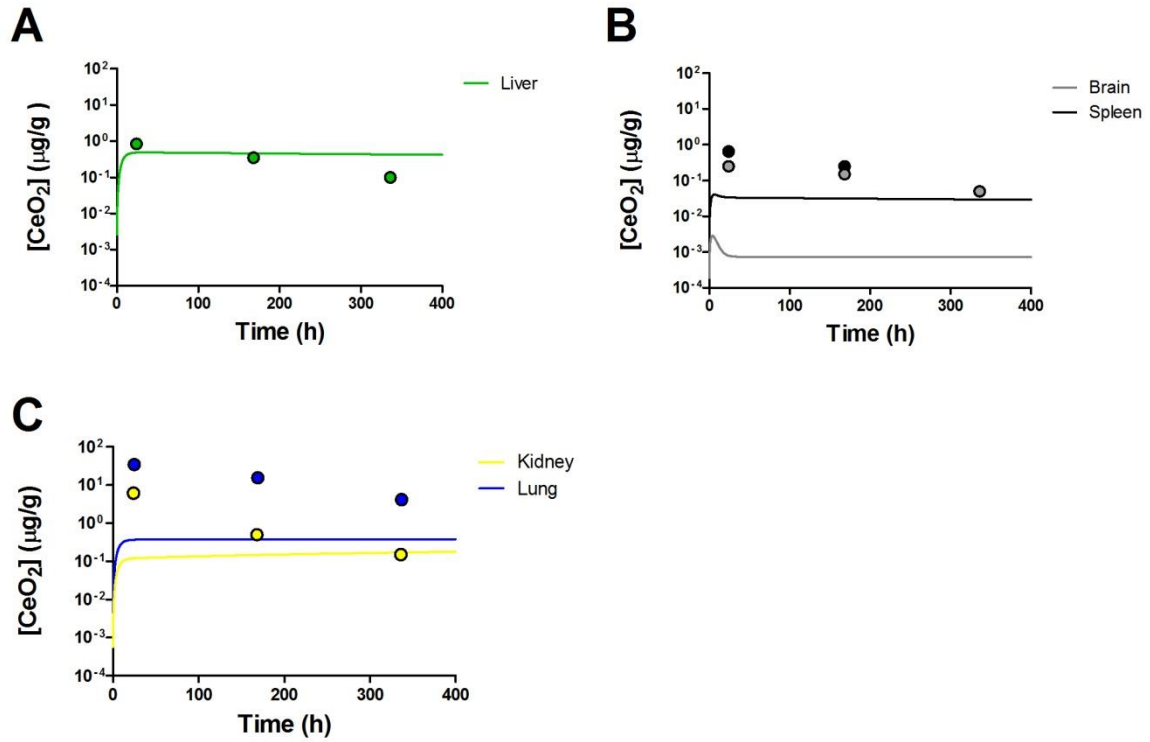

**Figure S19. Observed versus simulated concentrations in tissues (Park *et al.* 2009)**

Calibration of the PBPK model against independent data sets with nanoceria. (A-C) Simulated (solid curves) and observed (symbols) time courses of the nanoceria concentration in different tissues following an oral dose of 100 mg/kg.<sup>17</sup>

## Calibration inhalation

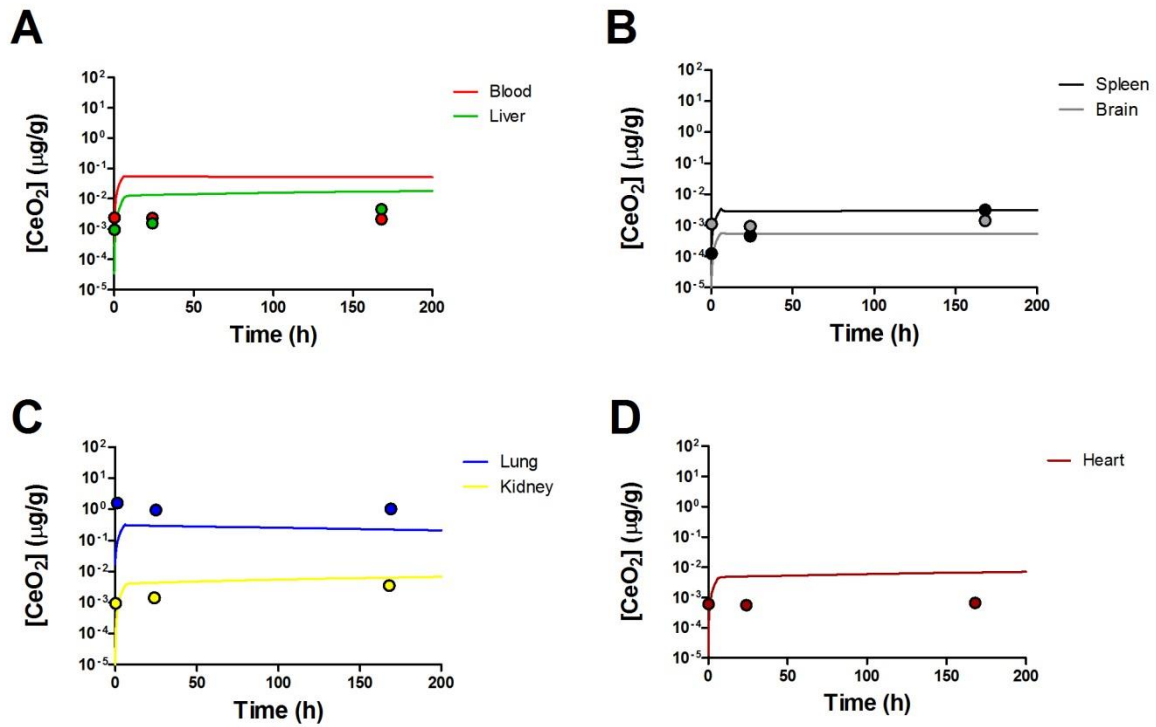

**Figure S20. Observed versus simulated concentrations in tissues (Li *et al.* 2016– Pristine)**

Calibration of the PBPK model against independent data sets with unaged (pristine) nanoceria. (A-D) Simulated (solid curves) and observed (symbols) time courses of the nanoceria concentration in different tissues following 6 h nose only inhalation, air concentration 0.6 mg/m<sup>3</sup>.<sup>10</sup>

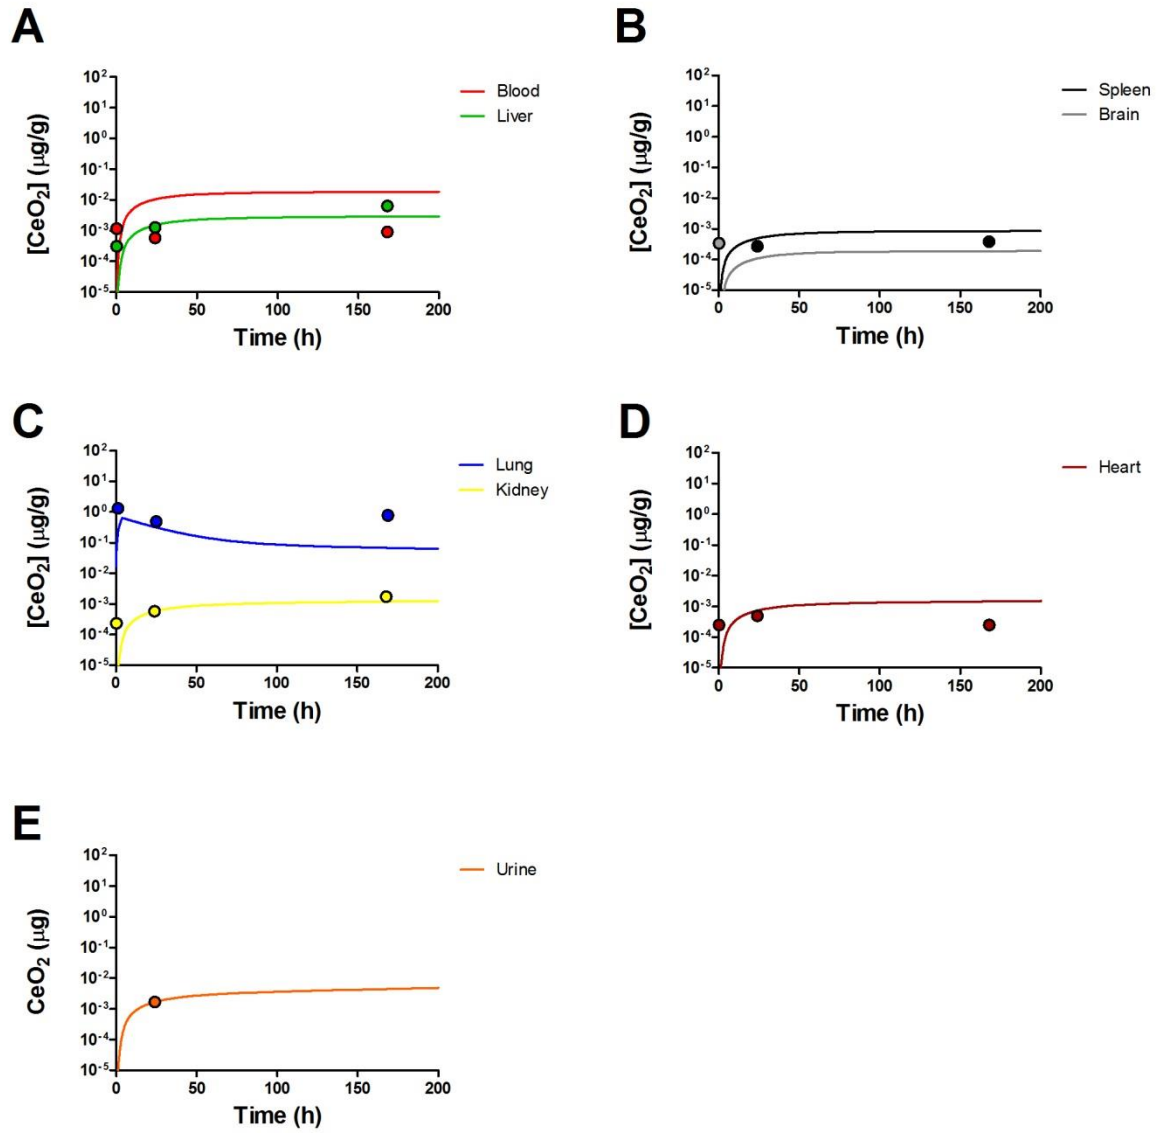

**Figure S21. Observed versus simulated concentrations in tissues (Li *et al.* 2016 – Aged)**

Calibration of the PBPK model against independent data sets with aged nanoceria. (A-E) Simulated (solid curves) and observed (symbols) time courses of the nanoceria concentration in different tissues following 4 h nose only inhalation, air concentration  $0.4 \text{ mg/m}^3$ .

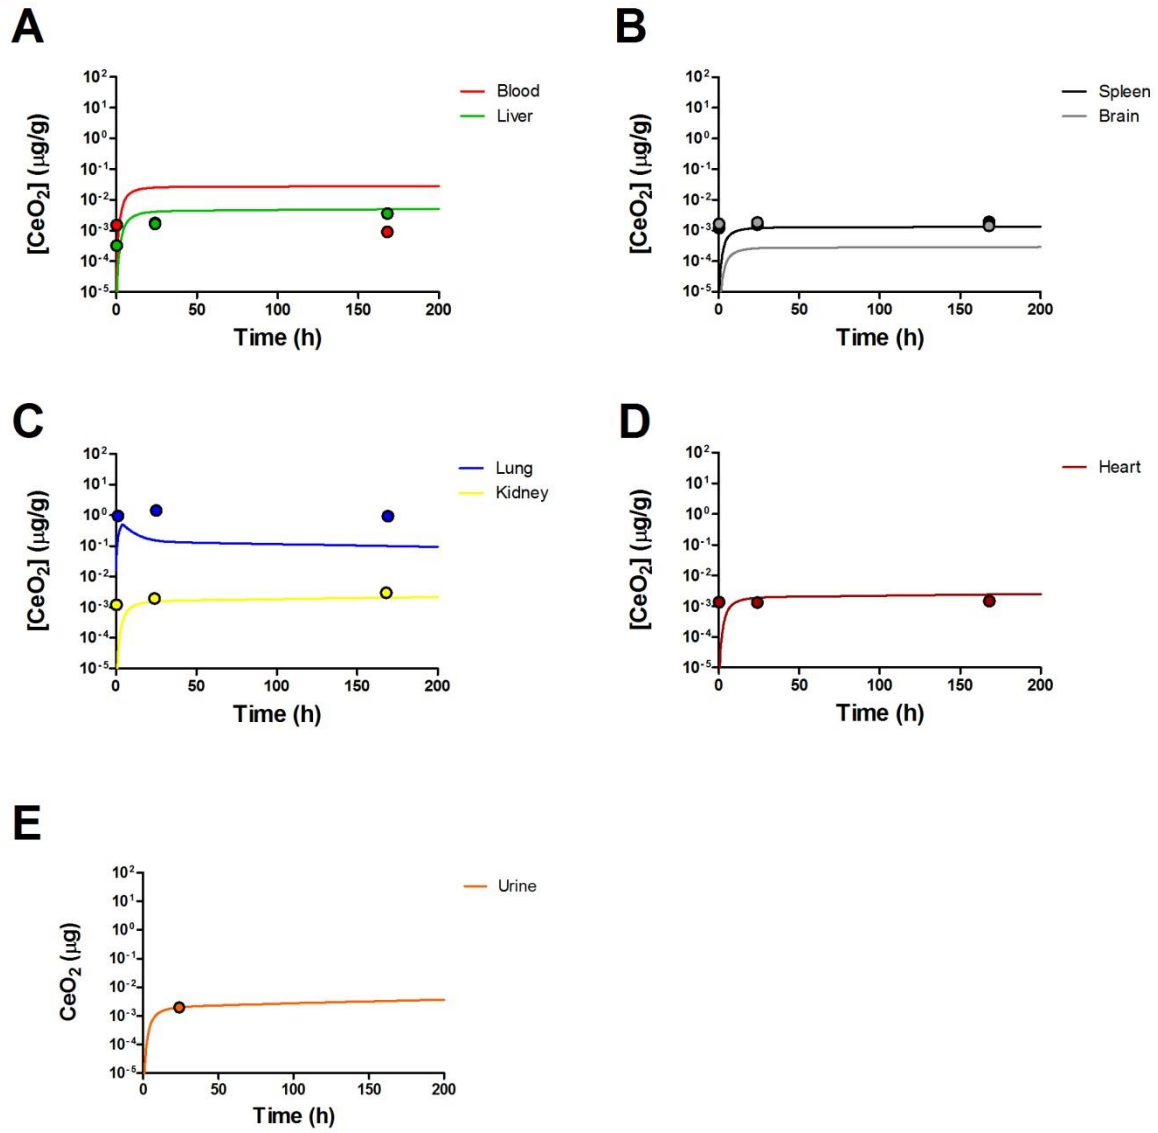

**Figure S22. Observed versus simulated concentrations in tissues (Li *et al.* 2016 – Aged)**

Calibration of the PBPK model against independent data sets with aged nanoceria. (A-E) Simulated (solid curves) and observed (symbols) time courses of the nanoceria concentration in different tissues following 4 h nose only inhalation, air concentration  $0.5 \text{ mg/m}^3$ .



## Calibration *it* instillation

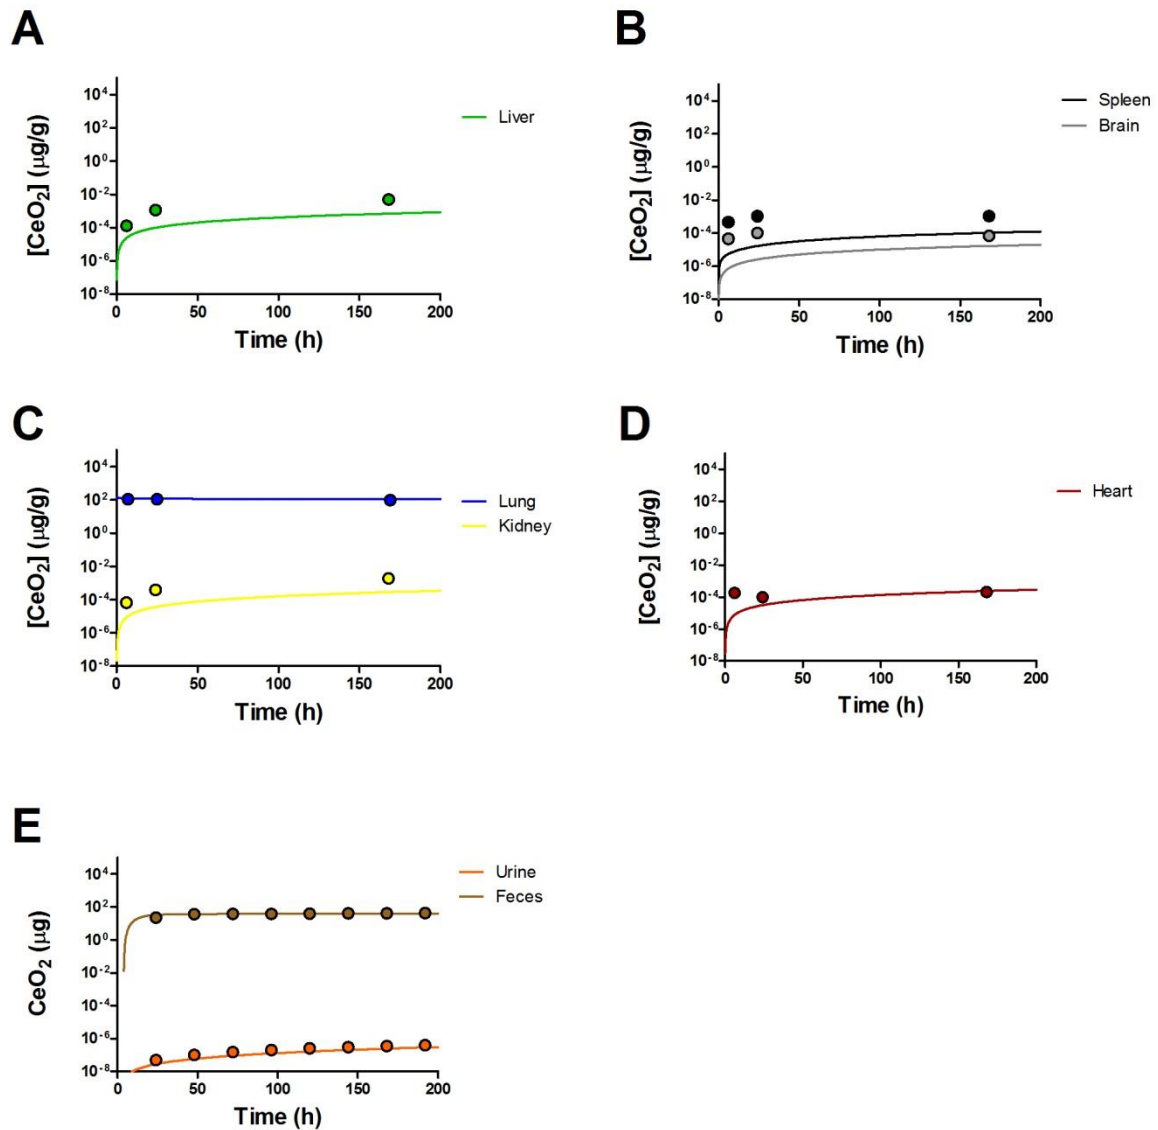

**Figure S23. Observed versus simulated concentrations in tissues (He *et al.* 2010)**

Calibration of the PBPK model against independent data sets with nanoceria. (A-E) Simulated (solid curves) and observed (symbols) time courses of the nanoceria concentration in different tissues following *it* instillation of 1 mg.<sup>12</sup>

## References

1. Li D, Johanson G, Emond C, Carlander U, Philbert M, Jolliet O. Physiologically based pharmacokinetic modeling of polyethylene glycol-coated polyacrylamide nanoparticles in rats. *Nanotoxicology*. Jan 6 2014;8(S1):128–137.
2. Yokel RA, Tseng MT, Dan M, et al. Biodistribution and biopersistence of ceria engineered nanomaterials: size dependence. *Nanomedicine*. Apr 2013;9(3):398-407.
3. Yokel RA, Unrine JM, Wu P, Wang BH, Grulke EA. Nanoceria biodistribution and retention in the rat after its intravenous administration are not greatly influenced by dosing schedule, dose, or particle shape. *Environ-Sci Nano*. Dec 2014;1(6):549-560.
4. Heckman KL, DeCoteau W, Estevez A, et al. Custom cerium oxide nanoparticles protect against a free radical mediated autoimmune degenerative disease in the brain. *ACS Nano*. Dec 23 2013;7(12):10582-10596.
5. Dan M, Wu P, Grulke EA, Graham UM, Unrine JM, Yokel RA. Ceria-engineered nanomaterial distribution in, and clearance from, blood: size matters. *Nanomedicine (Lond)*. Jan 2012;7(1):95-110.
6. Yokel RA, Florence RL, Unrine JM, et al. Biodistribution and oxidative stress effects of a systemically-introduced commercial ceria engineered nanomaterial. *Nanotoxicology*. 2009;3(3):234-248.
7. Konduru NV, Jimenez RJ, Swami A, et al. Silica coating influences the corona and biokinetics of cerium oxide nanoparticles. *Particle and Fibre Toxicology*. Oct 12 2015;12.
8. Hardas SS, Butterfield DA, Sultana R, et al. Brain distribution and toxicological evaluation of a systemically delivered engineered nanoscale ceria. *Toxicological sciences*. Aug 2010;116(2):562-576.
9. Yokel RA, Au TC, MacPhail R, et al. Distribution, elimination, and biopersistence to 90 days of a systemically introduced 30 nm ceria-engineered nanomaterial in rats. *Toxicological Sciences*. May 2012;127(1):256-268.
10. Li D, Morishita M, Wagner JG, et al. In vivo biodistribution and physiologically based pharmacokinetic modeling of inhaled fresh and aged cerium oxide nanoparticles in rats. *Particle and Fibre Toxicology*. 2016;13(1):45.
11. Geraets L, Oomen AG, Krystek P, et al. Tissue distribution and elimination after oral and intravenous administration of different titanium dioxide nanoparticles in rats. *Particle and Fibre Toxicology*. 2014;11:30.
12. He X, Zhang H, Ma Y, et al. Lung deposition and extrapulmonary translocation of nano-ceria after intratracheal instillation. *Nanotechnology*. Jul 16 2010;21(28):285103.
13. Molina RM, Konduru NV, Jimenez RJ, et al. Bioavailability, distribution and clearance of tracheally instilled, gavaged or injected cerium dioxide nanoparticles and ionic cerium. *Environ-Sci Nano*. Dec 2014;1(6):561-573.
14. Kumari M, Kumari SI, Grover P. Genotoxicity analysis of cerium oxide micro and nanoparticles in Wistar rats after 28 days of repeated oral administration. *Mutagenesis*. Nov 2014;29(6):467-479.
15. Kumari M, Kumari SI, Kamal SSK, Grover P. Genotoxicity assessment of cerium oxide nanoparticles in female Wistar rats after acute oral exposure. *Mutat Res-Gen Tox En*. Dec 2014;775:7-19.
16. Konduru NV, Murdaugh KM, Sotiriou GA, et al. Bioavailability, distribution and clearance of tracheally-instilled and gavaged uncoated or silica-coated zinc oxide nanoparticles. *Particle and fibre toxicology*. 2014;11:44.
17. Park EJ, Park YK, Park K. Acute toxicity and tissue distribution of cerium oxide nanoparticles by a single oral administration in rats *Toxicological Research KSOT*. 2009;25(2):79-84
